# Supplementary material
Source: publisher figshare collection journal article supplement (https://gsapubs.figshare.com/articles/dataset/_/24128781)
Supplement: Supplementary file 1 [file 1]

## Sheet: AMNH Gilder 
Zircon batch	number	Final207_235	207_235_error	Final206_238	206_238_error	Rho_6_38vs7_35	Final238_206	238_206_error	Final207_206	207_206_error	Rho_38_6vs7_6	FinalAge207_235	207_235_error	FinalAge206_238	206_238_error	FinalAge207_206	207_206_error	% discordance
AMNH-GS-11-1A	Output_1_1	1.97	0.28	0.193	0.023	0.88696	5.18135	0.617466	0.0735	0.0044	-0.22468	1080	100	1130	120	1000	120	4.62963
AMNH-GS-11-1A	Output_1_2	1.52	0.25	0.156	0.022	0.97103	6.41026	0.904011	0.0684	0.0038	-0.691	900	120	930	120	850	120	3.33333
AMNH-GS-11-1A	Output_1_3	2.43	0.1	0.223	0.01	0.54017	4.4843	0.20109	0.0792	0.0033	0.47775	1247	31	1297	54	1164	82	4.00962
AMNH-GS-11-1A	Output_1_4	2	0.16	0.193	0.014	0.88744	5.18135	0.375849	0.0755	0.0028	0.043431	1108	58	1134	75	1071	72	2.34657
AMNH-GS-11-1A	Output_1_5	2.23	0.12	0.219	0.014	0.72112	4.56621	0.291904	0.0748	0.0034	0.54511	1185	39	1272	74	1076	77	7.34177
AMNH-GS-11-1A	Output_1_6	10.55	0.97	0.473	0.031	0.95093	2.11416	0.138561	0.1596	0.006	-0.73273	2460	100	2490	140	2442	66	1.21951
AMNH-GS-11-1A	Output_1_7	2.98	0.11	0.2364	0.0085	0.65385	4.23012	0.152098	0.0915	0.0029	0.30789	1401	29	1367	44	1450	59	2.42684
AMNH-GS-11-1A	Output_1_8	3.77	0.14	0.277	0.01	0.64399	3.61011	0.130329	0.0988	0.003	0.47777	1583	30	1575	52	1614	47	0.50537
AMNH-GS-11-1A	Output_1_9	1.74	0.12	0.174	0.011	0.92046	5.74713	0.363324	0.0721	0.0025	-0.30862	1018	52	1034	62	977	72	1.57171
AMNH-GS-11-1A	Output_1_10	2.06	0.1	0.2006	0.0079	0.82848	4.98505	0.19632	0.0745	0.0021	-0.15701	1133	34	1177	42	1048	57	3.8835
AMNH-GS-11-1A	Output_1_11	1.92	0.14	0.174	0.0072	0.19307	5.74713	0.237812	0.0798	0.0047	0.12669	1084	46	1033	39	1170	100	4.7048
AMNH-GS-11-1A	Output_1_12	1.5	0.34	0.136	0.023	0.98772	7.35294	1.24351	0.0741	0.0051	-0.80113	870	140	820	130	1000	140	5.74713
AMNH-GS-11-1A	Output_1_13	2.64	0.17	0.223	0.012	0.94722	4.4843	0.241308	0.0855	0.0019	0.80015	1304	54	1296	65	1322	43	0.613497
AMNH-GS-11-1A	Output_1_14	1.732	0.066	0.1741	0.0055	0.83195	5.74383	0.181453	0.0717	0.0017	-0.075292	1019	25	1034	30	973	48	1.47203
AMNH-GS-11-1A	Output_1_15	1.694	0.05	0.1677	0.003	0.44193	5.96303	0.106673	0.0724	0.0017	0.067859	1005	19	999	17	992	47	0.597015
AMNH-GS-11-1A	Output_1_16	1.54	0.12	0.1561	0.0088	0.94124	6.40615	0.361141	0.0708	0.0022	-0.52114	941	50	934	50	942	63	0.743889
AMNH-GS-11-1A	Output_1_17	3.345	0.091	0.2625	0.0073	0.97313	3.80952	0.105941	0.0922	0.0012	0.83154	1490	22	1502	37	1469	24	0.805369
AMNH-GS-11-1A	Output_1_18	2.118	0.045	0.1936	0.0036	0.73895	5.16529	0.0960488	0.0791	0.0015	0.36607	1154	15	1141	20	1170	38	1.12652
AMNH-GS-11-1A	Output_1_19	2.67	0.26	0.228	0.016	0.97296	4.38596	0.307787	0.0837	0.0029	-0.71791	1303	79	1321	83	1275	70	1.38143
AMNH-GS-11-1A	Output_1_20	2.483	0.096	0.2132	0.0058	0.46653	4.69043	0.127601	0.0844	0.0027	-0.016586	1275	33	1245	30	1293	60	2.35294
AMNH-GS-11-1A	Output_1_21	2.4	0.32	0.2	0.022	0.97281	5	0.55	0.0841	0.0041	-0.091862	1210	120	1170	120	1270	100	3.30579
AMNH-GS-11-1A	Output_1_22	1.85	0.11	0.181	0.011	0.97205	5.52486	0.335765	0.0744	0.0015	0.68716	1060	40	1070	62	1048	39	0.943396
AMNH-GS-11-1A	Output_1_23	2.12	0.16	0.199	0.015	0.95635	5.02513	0.378778	0.0774	0.0016	-0.074769	1147	54	1166	80	1128	41	1.6565
AMNH-GS-11-1A	Output_1_24	2.778	0.084	0.238	0.0069	0.67597	4.20168	0.121813	0.0848	0.0021	0.39443	1348	22	1376	36	1306	46	2.07715
AMNH-GS-11-1A	Output_1_25	1.857	0.077	0.1822	0.007	0.62597	5.48847	0.210863	0.0742	0.0027	0.32069	1064	28	1078	38	1035	75	1.31579
AMNH-GS-11-1A	Output_1_26	2.348	0.076	0.2086	0.0054	0.39214	4.79386	0.124098	0.0817	0.0028	0.3586	1225	23	1221	29	1229	67	0.326531
AMNH-GS-11-1A	Output_1_27	2.25	0.091	0.2087	0.0092	0.72401	4.79157	0.211224	0.0775	0.002	0.41237	1194	28	1221	49	1128	50	2.26131
AMNH-GS-11-1A	Output_1_28	2.51	0.41	0.209	0.029	0.98779	4.78469	0.663904	0.0831	0.0045	-0.81892	1210	150	1210	160	1240	120	0
AMNH-GS-11-1A	Output_1_29	2.64	0.16	0.2243	0.009	0.78032	4.45831	0.178889	0.0853	0.0032	-0.30286	1307	46	1304	47	1310	72	0.229533
AMNH-GS-11-1A	Output_1_30	2.47	0.21	0.186	0.012	0.85026	5.37634	0.346861	0.0961	0.0043	-0.18471	1251	66	1096	65	1565	70	12.3901
AMNH-GS-11-1A	Output_1_31	2.86	0.39	0.223	0.027	0.96619	4.4843	0.542943	0.0919	0.0041	-0.57468	1330	120	1290	150	1451	82	3.00752
AMNH-GS-11-1A	Output_1_32	2.25	0.1	0.2129	0.009	0.76448	4.69704	0.19856	0.0769	0.0022	0.16757	1194	31	1243	47	1112	57	4.10385
AMNH-GS-11-1A	Output_1_33	2.07	0.21	0.197	0.017	0.74131	5.07614	0.438043	0.0749	0.0054	0.32553	1126	66	1155	90	1030	140	2.57549
AMNH-GS-11-1A	Output_1_34	1.74	0.23	0.176	0.029	0.85316	5.68182	0.936209	0.0746	0.0072	0.87465	1000	92	1030	160	1060	240	3
AMNH-GS-11-1A	Output_1_35	2.08	0.19	0.194	0.015	0.8715	5.15464	0.398555	0.0756	0.0037	0.30476	1132	61	1141	78	1060	100	0.795053
AMNH-GS-11-1A	Output_1_36	2.46	0.27	0.219	0.029	0.85524	4.56621	0.604658	0.0861	0.005	-0.072637	1243	81	1270	150	1350	130	2.17216
AMNH-GS-11-1A	Output_1_37	1.59	0.072	0.1617	0.0066	0.35209	6.18429	0.25242	0.0716	0.0034	0.46624	964	29	965	36	989	81	0.103734
AMNH-GS-11-1A	Output_1_38	1.858	0.08	0.1814	0.008	0.82955	5.51268	0.243117	0.0744	0.002	0.38299	1064	29	1074	43	1046	53	0.93985
AMNH-GS-11-1A	Output_1_39	1.62	0.12	0.163	0.011	0.85145	6.13497	0.414016	0.0725	0.0027	0.044286	970	46	969	62	988	76	0.103093
AMNH-GS-11-2A	Output_1_1	1.9	0.22	0.193	0.016	0.70446	5.18135	0.429542	0.0741	0.0031	0.6256	1091	62	1133	84	1028	86	3.84968
AMNH-GS-11-2A	Output_1_2	2.38	0.3	0.233	0.024	0.42318	4.29185	0.442078	0.0786	0.0073	0.68409	1245	78	1340	120	1160	160	7.63052
AMNH-GS-11-2A	Output_1_3	2.59	0.32	0.209	0.014	0.62263	4.78469	0.320505	0.0854	0.0059	0.084694	1271	96	1249	93	1290	130	1.73092
AMNH-GS-11-2A	Output_1_4	3.4	0.24	0.262	0.019	0.077352	3.81679	0.27679	0.0945	0.0055	0.64845	1494	57	1496	98	1490	110	0.133869
AMNH-GS-11-2A	Output_1_5	2.11	0.15	0.191	0.01	0.5598	5.2356	0.274115	0.0787	0.0033	0.25244	1144	51	1128	55	1150	81	1.3986
AMNH-GS-11-2A	Output_1_6	1.89	0.21	0.166	0.015	0.67429	6.0241	0.544346	0.0794	0.0038	0.51395	1063	74	989	84	1190	100	6.96143
AMNH-GS-11-2A	Output_1_7	2.72	0.32	0.216	0.02	0.91896	4.62963	0.428669	0.0871	0.0026	-0.64392	1343	85	1250	110	1355	63	6.9248
AMNH-GS-11-2A	Output_1_8	1.69	0.22	0.1613	0.0098	0.93882	6.19963	0.376667	0.074	0.0023	-0.42077	1013	77	962	55	1031	66	5.03455
AMNH-GS-11-2A	Output_1_9	2.68	0.4	0.211	0.016	0.92828	4.73934	0.359381	0.0864	0.0038	0.95602	1270	140	1230	85	1330	90	3.14961
AMNH-GS-11-2A	Output_1_10	1.72	0.13	0.1699	0.0069	0.51694	5.88582	0.239036	0.0697	0.0016	0.42006	1009	47	1011	38	933	58	0.198216
AMNH-GS-11-2A	Output_1_11	2.55	0.23	0.222	0.011	0.85004	4.5045	0.223196	0.0804	0.0038	0.30904	1271	76	1289	58	1189	93	1.41621
AMNH-GS-11-2A	Output_1_12	1.55	0.11	0.1465	0.0056	0.70238	6.82594	0.260923	0.073	0.0029	-0.31429	945	48	881	32	1028	67	6.77249
AMNH-GS-11-2A	Output_1_13	2.47	0.2	0.2093	0.0076	0.74919	4.77783	0.17349	0.0818	0.0026	-0.19427	1271	52	1224	40	1231	60	3.69788
AMNH-GS-11-2A	Output_1_14	1.92	0.23	0.167	0.011	0.80998	5.98802	0.394421	0.0826	0.0016	-0.35465	1098	68	994	58	1257	38	9.47177
AMNH-GS-11-2A	Output_1_15	2.79	0.22	0.2329	0.0091	0.8057	4.29369	0.167765	0.083	0.0021	0.018226	1342	63	1349	48	1263	51	0.52161
AMNH-GS-11-2A	Output_1_16	3	0.17	0.2315	0.0078	0.30927	4.31965	0.145543	0.0915	0.0026	0.62032	1402	45	1341	41	1450	54	4.35093
AMNH-GS-11-2A	Output_1_17	3.19	0.36	0.225	0.014	0.25723	4.44444	0.276543	0.102	0.006	0.27771	1466	70	1305	76	1640	110	10.9823
AMNH-GS-11-2A	Output_1_18	2.27	0.17	0.1958	0.0074	0.2638	5.10725	0.193022	0.0806	0.0033	-0.068764	1195	55	1152	40	1222	92	3.59833
AMNH-GS-11-2A	Output_1_19	2.69	0.36	0.217	0.016	0.95494	4.6083	0.339782	0.0877	0.0016	-0.40429	1332	91	1262	88	1372	36	5.25526
AMNH-GS-11-2A	Output_1_20	1.99	0.2	0.1728	0.0077	0.94041	5.78704	0.257871	0.0813	0.0021	0.13829	1121	62	1026	43	1222	53	8.47458
AMNH-GS-11-2A	Output_1_21	1.62	0.14	0.1563	0.0052	0.94492	6.39795	0.212856	0.0735	0.002	0.47588	971	55	936	29	1021	54	3.60453
AMNH-GS-11-2A	Output_1_22	2.04	0.13	0.186	0.0044	0.41676	5.37634	0.127182	0.0761	0.0022	0.49279	1124	46	1100	24	1090	58	2.13523
AMNH-GS-11-2A	Output_1_23	1.73	0.23	0.173	0.016	0.74919	5.78035	0.534598	0.0699	0.0035	0.3664	1026	76	1023	89	940	120	0.292398
AMNH-GS-11-2A	Output_1_24	0.94	0.15	0.0987	0.0077	0.6782	10.1317	0.790417	0.0633	0.0035	0.1849	656	78	606	45	690	110	7.62195
AMNH-GS-11-2A	Output_1_25	2.12	0.25	0.191	0.015	0.83967	5.2356	0.411173	0.0756	0.0039	-0.13047	1133	90	1121	79	1060	110	1.05914
AMNH-GS-11-2A	Output_1_26	3.88	0.36	0.296	0.016	0.69959	3.37838	0.182615	0.0882	0.0032	0.63322	1594	73	1669	77	1378	68	4.70514
AMNH-GS-11-2A	Output_1_27	2.85	0.24	0.23	0.014	0.6423	4.34783	0.26465	0.085	0.0033	0.065204	1380	54	1332	71	1304	75	3.47826
AMNH-GS-11-2A	Output_1_28	1.64	0.2	0.163	0.012	0.8203	6.13497	0.451654	0.0706	0.0036	-0.16234	998	67	969	67	920	100	2.90581
AMNH-GS-11-2A	Output_1_29	1.61	0.12	0.1644	0.0095	0.3169	6.08272	0.351496	0.0695	0.0028	0.71713	968	47	980	52	902	79	1.23967
AMNH-GS-11-2A	Output_1_30	1.87	0.19	0.172	0.013	0.84583	5.81395	0.439427	0.0718	0.0017	0.2715	1056	72	1021	70	977	48	3.31439
AMNH-GS-11-2A	Output_1_31	2.09	0.18	0.1939	0.0044	-0.17352	5.1573	0.11703	0.0768	0.0026	0.2485	1132	75	1142	24	1105	70	0.883392
AMNH-GS-11-2A	Output_1_33	2.76	0.18	0.223	0.012	0.58444	4.4843	0.241308	0.0833	0.0022	-0.04007	1336	55	1294	64	1270	53	3.14371
AMNH-GS-11-2A	Output_1_35	1.55	0.2	0.149	0.01	0.90543	6.71141	0.45043	0.0703	0.0024	-0.34685	959	71	895	57	926	71	6.67362
AMNH-GS-11-2A	Output_1_36	2.11	0.11	0.1935	0.0065	0.12584	5.16796	0.173601	0.0745	0.0028	0.3666	1147	36	1140	35	1043	76	0.610288
AMNH-GS-11-2A	Output_1_38	1.97	0.16	0.1808	0.0077	0.65667	5.53097	0.235556	0.0723	0.0018	-0.066161	1094	60	1071	42	988	51	2.10238
AMNH-GS-11-2A	Output_1_39	1.92	0.27	0.185	0.016	0.81919	5.40541	0.467494	0.0715	0.0027	-0.26872	1097	87	1091	89	959	81	0.546946
AMNH-GS-11-2A	Output_1_40	4.02	0.2	0.2753	0.0096	0.22252	3.6324	0.126666	0.0988	0.0037	0.12463	1632	41	1567	48	1590	69	3.98284
AMNH-GS-11-2A	Output_1_41	2.57	0.28	0.2188	0.0098	0.76924	4.57038	0.204706	0.0811	0.002	0.35699	1304	66	1274	52	1218	50	2.30061
AMNH-GS-11-2A	Output_1_42	3.99	0.33	0.285	0.012	0.90482	3.50877	0.147738	0.094	0.0018	0.14545	1618	73	1615	62	1517	32	0.185414
AMNH-GS-11-2A	Output_1_43	1.73	0.26	0.162	0.016	0.94601	6.17284	0.609663	0.0741	0.0022	-0.65386	980	110	964	92	1035	63	1.63265
AMNH-GS-11-2A	Output_1_45	1.77	0.2	0.1568	0.0081	0.9575	6.37755	0.329453	0.0843	0.0015	-0.01911	1040	67	938	45	1296	35	9.80769
AMNH-GS-11-2A	Output_1_46	2.34	0.29	0.216	0.015	0.75742	4.62963	0.321502	0.09	0.0034	-0.046888	1234	77	1260	78	1415	73	2.10697
AMNH-GS-11-2A	Output_1_47	1.59	0.18	0.154	0.013	0.56607	6.49351	0.548153	0.0882	0.0045	0.75715	977	58	920	72	1400	110	5.83419
AMNH-GS-11-2A	Output_1_48	2.6	0.25	0.223	0.013	0.62204	4.4843	0.261417	0.0976	0.0055	-0.025242	1307	62	1293	71	1550	110	1.07116
AMNH-GS-11-2A	Output_1_49	1.57	0.13	0.1525	0.008	0.51402	6.55738	0.343994	0.0816	0.0039	0.6662	952	51	914	45	1219	93	3.9916
AMNH-GS-11-2A	Output_1_50	2.06	0.16	0.184	0.013	0.67706	5.43478	0.383979	0.0883	0.004	0.00074541	1127	53	1088	69	1371	90	3.46051
AMNH-GS-11-2B	Output_1_1	2.083	0.095	0.2037	0.0099	0.49316	4.90918	0.238591	0.0751	0.0046	0.63299	1152	38	1194	53	1040	120	3.64583
AMNH-GS-11-2B	Output_1_2	3.02	0.34	0.252	0.021	0.76253	3.96825	0.330688	0.0823	0.005	0.31456	1391	82	1440	110	1270	140	3.52265
AMNH-GS-11-2B	Output_1_3	2.12	0.18	0.221	0.019	0.81263	4.52489	0.389017	0.0703	0.0038	0.35496	1145	59	1280	100	947	99	11.7904
AMNH-GS-11-2B	Output_1_4	2.58	0.21	0.231	0.021	0.76717	4.329	0.393546	0.0817	0.005	0.4958	1283	60	1340	110	1210	120	4.44271
AMNH-GS-11-2B	Output_1_5	2	0.16	0.187	0.014	0.74966	5.34759	0.400355	0.0782	0.0045	0.39175	1107	54	1101	75	1130	110	0.542005
AMNH-GS-11-2B	Output_1_6	3.13	0.28	0.244	0.012	0.65506	4.09836	0.201559	0.0907	0.0064	0.30225	1428	67	1404	64	1400	130	1.68067
AMNH-GS-11-2B	Output_1_7	2.37	0.26	0.225	0.024	0.95022	4.44444	0.474074	0.0767	0.0036	-0.10492	1240	100	1350	160	1093	99	8.87097
AMNH-GS-11-2B	Output_1_8	1.36	0.27	0.135	0.023	0.99364	7.40741	1.262	0.0691	0.004	-0.73765	870	150	810	130	870	130	6.89655
AMNH-GS-11-2B	Output_1_9	1.98	0.12	0.195	0.011	0.86381	5.12821	0.289283	0.0735	0.0021	0.25941	1103	40	1148	60	1019	58	4.07978
AMNH-GS-11-2B	Output_1_10	1.84	0.13	0.177	0.011	0.9126	5.64972	0.351112	0.0752	0.0024	-0.085697	1053	49	1050	58	1066	66	0.2849
AMNH-GS-11-2B	Output_1_11	1.775	0.064	0.1768	0.007	0.59495	5.65611	0.223941	0.0733	0.0027	0.63546	1035	23	1049	38	1009	73	1.35266
AMNH-GS-11-2B	Output_1_12	1.58	0.15	0.165	0.014	0.93441	6.06061	0.514233	0.0692	0.0025	-0.41799	970	56	979	80	891	78	0.927835
AMNH-GS-11-2B	Output_1_13	1.69	0.2	0.178	0.017	0.9329	5.61798	0.536548	0.0682	0.0036	-0.56658	986	91	1050	98	850	120	6.49087
AMNH-GS-11-2B	Output_1_14	2.204	0.072	0.215	0.01	0.85499	4.65116	0.216333	0.0737	0.0015	0.27046	1181	23	1255	55	1030	43	6.26588
AMNH-GS-11-2B	Output_1_15	2.27	0.11	0.21	0.012	0.76559	4.7619	0.272109	0.079	0.0027	0.40635	1200	36	1229	64	1162	66	2.41667
AMNH-GS-11-2B	Output_1_16	2.812	0.096	0.2395	0.0079	0.88103	4.17537	0.137726	0.0853	0.0016	-0.077937	1357	26	1383	41	1318	37	1.91599
AMNH-GS-11-2B	Output_1_17	3.083	0.082	0.2528	0.0061	0.82524	3.9557	0.09545	0.0887	0.0015	0.23354	1427	20	1453	31	1395	32	1.822
AMNH-GS-11-2B	Output_1_18	2.875	0.062	0.2418	0.0052	0.71298	4.13565	0.0889387	0.0866	0.0013	0.64749	1375	16	1396	27	1350	29	1.52727
AMNH-GS-11-2B	Output_1_19	2.66	0.14	0.222	0.0082	0.70391	4.5045	0.166383	0.0851	0.0032	0.43723	1313	40	1291	44	1307	71	1.67555
AMNH-GS-11-2B	Output_1_20	3.018	0.099	0.243	0.0056	0.73563	4.11523	0.0948365	0.0888	0.0019	0.47157	1410	25	1402	29	1395	42	0.567376
AMNH-GS-11-2B	Output_1_21	1.98	0.22	0.1628	0.0049	0.59512	6.14251	0.184879	0.0883	0.0077	-0.22063	1093	72	972	27	1330	160	11.0704
AMNH-GS-11-2B	Output_1_22	1.96	0.046	0.1836	0.0035	0.69989	5.44662	0.10383	0.0768	0.0019	0.65085	1101	16	1086	19	1126	40	1.3624

## Sheet: RNHW
Zircon batch	number	Final207_235	207_235_error	Final206_238	206_238_error	Rho_6_38vs7_35	Final238_206	238_206_error	Final207_206	207_206_error	Rho_38_6vs7_6	FinalAge207_235	207_235_error	FinalAge206_238	206_238_error	FinalAge207_206	207_206_error	% discordance
RNHWA	Output_1_1	2.19	0.093	0.2099	0.0083	0.19942	4.76417	0.188388	0.0756	0.0036	0.37342	1175	30	1227	45	1066	91	4.42553
RNHWA	Output_1_2	1.94	0.13	0.191	0.011	0.81221	5.2356	0.301527	0.0733	0.0034	-0.17061	1089	45	1123	59	1002	99	3.12213
RNHWA	Output_1_3	5.67	0.18	0.348	0.012	0.15395	2.87356	0.0990884	0.1181	0.0036	0.45458	1925	27	1925	58	1921	54	0
RNHWA	Output_1_4	14.77	0.37	0.557	0.025	0.36383	1.79533	0.0805804	0.192	0.0058	0.36813	2799	24	2850	100	2753	51	1.82208
RNHWA	Output_1_5	1.95	0.13	0.1841	0.0063	0.4551	5.43183	0.18588	0.0775	0.0041	-0.037388	1091	47	1089	34	1110	110	0.183318
RNHWA	Output_1_6	1.82	0.18	0.18	0.015	0.88878	5.55556	0.462963	0.0719	0.0031	-0.38426	1061	55	1062	84	996	96	0.0942507
RNHWA	Output_1_7	1.742	0.09	0.173	0.0087	0.86463	5.78035	0.290688	0.0721	0.002	0.025596	1032	39	1027	47	982	55	0.484496
RNHWA	Output_1_8	1.395	0.058	0.1482	0.0066	0.24276	6.74764	0.300502	0.0674	0.0024	0.71365	885	24	890	37	862	84	0.564972
RNHWA	Output_1_9	1.66	0.12	0.1532	0.0066	0.32103	6.52742	0.281207	0.0765	0.0051	0.208	986	47	918	37	1070	130	6.89655
RNHWA	Output_1_10	2.63	0.12	0.2225	0.0062	0.20631	4.49438	0.125237	0.0865	0.0039	0.34131	1305	35	1295	33	1333	88	0.766284
RNHWA	Output_1_11	2.506	0.094	0.2082	0.0088	0.4748	4.80307	0.203012	0.0861	0.0033	0.4156	1271	28	1218	47	1328	76	4.16994
RNHWA	Output_1_12	2.27	0.12	0.1987	0.0074	0.47023	5.03271	0.187429	0.0832	0.0046	0.23195	1199	36	1167	40	1250	110	2.66889
RNHWA	Output_1_13	2.23	0.14	0.2004	0.0062	0.14535	4.99002	0.154382	0.0805	0.0053	0.16056	1184	43	1177	33	1180	130	0.591216
RNHWA	Output_1_14	1.48	0.16	0.145	0.014	0.96264	6.89655	0.665874	0.0731	0.0031	-0.6736	908	67	872	80	1002	87	3.96476
RNHWA	Output_1_15	2.054	0.087	0.196	0.01	0.58371	5.10204	0.260308	0.0767	0.0024	0.40235	1131	29	1152	54	1105	61	1.85676
RNHWA	Output_1_16	1.92	0.17	0.1863	0.0097	0.05704	5.36769	0.279477	0.0749	0.0071	0.35083	1078	58	1100	52	1000	190	2.04082
RNHWA	Output_1_17	1.813	0.077	0.1813	0.0092	0.51908	5.51572	0.279893	0.0726	0.0033	0.48399	1048	27	1073	50	985	91	2.3855
RNHWA	Output_1_18	2.07	0.12	0.198	0.01	0.74948	5.05051	0.255076	0.0751	0.003	-0.053127	1133	40	1161	54	1058	80	2.47132
RNHWA	Output_1_19	1.98	0.12	0.1814	0.0072	0.39285	5.51268	0.218805	0.0785	0.0042	0.17004	1102	42	1074	40	1140	110	2.54083
RNHWA	Output_1_20	1.69	0.15	0.168	0.011	0.19327	5.95238	0.389739	0.0735	0.0064	0.37299	995	59	1000	62	1030	150	0.502513
RNHWA	Output_1_21	2.013	0.07	0.1915	0.0089	0.84886	5.22193	0.24269	0.0761	0.0026	-0.32956	1118	23	1128	48	1088	71	0.894454
RNHWA	Output_1_22	2.2	0.14	0.2089	0.0099	0.51427	4.78698	0.22686	0.0767	0.004	-0.11919	1176	46	1221	52	1090	100	3.82653
RNHWA	Output_1_23	2.87	0.13	0.238	0.012	0.48475	4.20168	0.211849	0.0878	0.0037	0.3713	1370	35	1372	62	1363	87	0.145985
RNHWA	Output_1_24	1.774	0.085	0.1721	0.0099	0.63777	5.81058	0.334252	0.0759	0.0036	0.29131	1045	37	1022	54	1075	94	2.20096
RNHWA	Output_1_25	2.11	0.11	0.2	0.011	0.36035	5	0.275	0.0765	0.0039	0.49965	1149	35	1173	58	1090	100	2.08877
RNHWA	Output_1_26	2.6	0.2	0.22	0.012	0.28521	4.54545	0.247934	0.0856	0.007	0.29898	1291	59	1280	65	1280	160	0.852053
RNHWA	Output_1_27	0.687	0.072	0.0879	0.006	0.71604	11.3766	0.776557	0.0562	0.0041	-0.043451	525	41	543	35	420	150	3.42857
RNHWA	Output_1_28	2.92	0.19	0.233	0.015	0.72586	4.29185	0.276299	0.0905	0.0045	0.24032	1379	48	1347	77	1419	91	2.32052
RNHWA	Output_1_29	2.66	0.17	0.225	0.016	0.89124	4.44444	0.316049	0.0857	0.0027	-0.035358	1310	47	1305	85	1323	62	0.381679
RNHWA	Output_1_31	2.58	0.2	0.217	0.018	0.81829	4.6083	0.382255	0.0869	0.004	-0.029475	1284	58	1261	95	1340	88	1.79128
RNHWA	Output_1_32	2.28	0.12	0.1993	0.0074	0.55867	5.01756	0.186302	0.0821	0.0032	0.021751	1201	37	1171	40	1236	75	2.49792
RNHWA	Output_1_33	1.92	0.12	0.182	0.01	0.29105	5.49451	0.301896	0.0773	0.0045	0.35741	1085	40	1079	54	1100	110	0.552995
RNHWA	Output_1_34	1.763	0.068	0.168	0.0061	-0.0019177	5.95238	0.216128	0.0762	0.0035	0.48468	1030	25	1001	34	1083	92	2.81553
RNHWA	Output_1_35	2.239	0.081	0.1954	0.0071	0.56998	5.11771	0.185956	0.0826	0.0028	0.17553	1191	25	1150	38	1248	68	3.44249
RNHWA	Output_1_36	2.048	0.085	0.187	0.0055	0.36707	5.34759	0.157282	0.0799	0.0035	0.1558	1129	29	1105	30	1176	89	2.12578
RNHWA	Output_1_37	1.541	0.042	0.1602	0.0058	0.40439	6.2422	0.225997	0.0702	0.0019	0.19602	946	17	958	32	929	54	1.2685
RNHWA	Output_1_38	2.21	0.13	0.193	0.011	0.022994	5.18135	0.29531	0.0837	0.0059	0.60488	1178	41	1138	58	1240	150	3.39559
RNHWA	Output_1_39	1.85	0.13	0.1699	0.0054	0.18509	5.88582	0.187071	0.0791	0.0053	0.10507	1057	49	1011	30	1140	140	4.35194
RNHWA	Output_1_40	2.09	0.14	0.1877	0.0068	0.25967	5.32765	0.19301	0.0809	0.0048	0.14952	1140	46	1108	37	1190	120	2.80702
RNHWA	Output_1_41	3.026	0.095	0.2391	0.0084	0.43116	4.18235	0.146933	0.0914	0.0019	0.36344	1413	24	1381	44	1450	41	2.26469
RNHWA	Output_1_42	2.86	0.18	0.218	0.012	0.57587	4.58716	0.252504	0.0954	0.0046	0.11093	1364	48	1270	64	1519	93	6.8915
RNHWA	Output_1_43	2.204	0.084	0.2017	0.0043	0.52237	4.95786	0.105695	0.0801	0.0023	0.033782	1180	27	1184	23	1192	56	0.338983
RNHWA	Output_1_44	3.02	0.11	0.2413	0.0081	0.51415	4.14422	0.139114	0.0914	0.0032	0.11417	1410	29	1393	43	1446	68	1.20567
RNHWA	Output_1_45	2.446	0.09	0.2067	0.0075	0.72847	4.83793	0.175542	0.0873	0.0031	0.53229	1254	26	1210	40	1356	66	3.50877
RNHWA	Output_1_46	1.369	0.047	0.1474	0.0054	0.54369	6.78426	0.248541	0.0685	0.002	0.52323	875	20	886	30	878	59	1.25714
RNHWA	Output_1_47	2.08	0.11	0.1928	0.0055	0.1695	5.18672	0.147961	0.0797	0.0038	0.027081	1139	36	1136	30	1170	100	0.263389
RNHW11B	Output_1_1	1.93	0.17	0.1907	0.009	0.90403	5.24384	0.247481	0.0759	0.0017	0.11371	1105	51	1124	49	1089	45	1.71946
RNHW11B	Output_1_2	0.752	0.035	0.0904	0.004	0.62479	11.0619	0.489467	0.0646	0.0026	0.0032472	576	25	557	24	750	82	3.29861
RNHW11B	Output_1_3	1.28	0.21	0.133	0.012	0.92044	7.5188	0.678388	0.0702	0.0035	-0.45377	809	99	804	70	910	110	0.618047
RNHW11B	Output_1_4	1.99	0.13	0.201	0.012	0.55724	4.97512	0.297022	0.0768	0.0014	0.21054	1106	45	1181	65	1113	36	6.78119
RNHW11B	Output_1_5	1.79	0.15	0.1624	0.0073	0.72609	6.15763	0.27679	0.0837	0.003	0.41253	1050	44	969	41	1276	70	7.71429
RNHW11B	Output_1_6	2.6	0.36	0.23	0.033	0.77506	4.34783	0.623819	0.0878	0.0082	0.31363	1270	100	1320	170	1320	180	3.93701
RNHW11B	Output_1_7	2.1	0.13	0.198	0.012	0.66239	5.05051	0.306091	0.0782	0.003	-0.37763	1144	49	1161	64	1140	80	1.48601
RNHW11B	Output_1_8	1.75	0.24	0.192	0.03	0.89528	5.20833	0.813802	0.07	0.0042	0.45866	1039	94	1120	150	940	100	7.79596
RNHW11B	Output_1_9	0.716	0.05	0.0823	0.0039	0.52193	12.1507	0.575791	0.0628	0.0038	0.45329	546	29	509	23	680	120	6.77656
RNHW11B	Output_1_10	2.003	0.059	0.1763	0.0086	-0.058104	5.67215	0.27669	0.081	0.0061	0.65538	1116	20	1046	47	1190	120	6.2724
RNHW11B	Output_1_11	1.75	0.2	0.1726	0.0092	0.77934	5.79374	0.308821	0.0734	0.0029	0.13348	1010	83	1025	51	1011	83	1.48515
RNHW11B	Output_1_12	2.16	0.17	0.195	0.014	0.44568	5.12821	0.368179	0.08	0.004	0.37306	1158	61	1147	72	1180	100	0.949914
RNHW11B	Output_1_13	1.97	0.31	0.199	0.035	0.80751	5.02513	0.883816	0.0737	0.0069	0.35691	1070	110	1150	180	960	200	7.47664
RNHW11B	Output_1_14	1.69	0.14	0.166	0.013	0.56719	6.0241	0.471767	0.0734	0.0044	0.4176	998	54	988	71	1000	120	1.002
RNHW12	Output_1_1	2.21	0.21	0.202	0.019	0.97775	4.9505	0.465641	0.0798	0.0021	0.18988	1172	68	1180	100	1187	50	0.682594
RNHW12	Output_1_2	2.39	0.26	0.238	0.024	0.98838	4.20168	0.423699	0.0844	0.0022	-0.42435	1217	93	1370	130	1295	54	12.5719
RNHW12	Output_1_3	1.51	0.35	0.172	0.033	0.99765	5.81395	1.11547	0.0763	0.0052	-0.86866	870	160	1010	190	1060	150	16.092
RNHW12	Output_1_5	2.08	0.15	0.187	0.016	0.95314	5.34759	0.457548	0.0802	0.0022	0.78791	1134	54	1099	90	1214	67	3.08642
RNHW12	Output_1_6	1.65	0.26	0.164	0.023	0.9631	6.09756	0.855146	0.0712	0.0032	-0.36754	960	110	970	130	946	93	1.04167
RNHW12	Output_1_7	2.92	0.29	0.261	0.025	0.92249	3.83142	0.366994	0.0818	0.0034	0.083458	1371	77	1490	130	1227	78	8.6798
RNHW12	Output_1_8	3.56	0.37	0.273	0.026	0.93778	3.663	0.348857	0.0937	0.0038	-0.30744	1522	87	1550	130	1491	77	1.83968
RNHW12	Output_1_9	2.01	0.15	0.198	0.017	0.89256	5.05051	0.433629	0.074	0.0029	0.44822	1111	51	1162	90	1028	76	4.59046
RNHW12	Output_1_10	1.9	0.22	0.191	0.023	0.9736	5.2356	0.630465	0.0725	0.0022	-0.14089	1064	82	1120	120	993	62	5.26316
RNHW12	Output_1_11	2.31	0.31	0.2	0.026	0.90568	5	0.65	0.0834	0.0047	-0.19631	1190	100	1170	140	1250	120	1.68067
RNHW12	Output_1_12	2.83	0.31	0.229	0.026	0.93261	4.36681	0.495795	0.0894	0.0039	-0.16428	1376	73	1320	140	1400	85	4.06977
RNHW12	Output_1_13	2.92	0.21	0.247	0.013	0.85755	4.04858	0.213083	0.0834	0.0031	-0.080783	1380	54	1421	65	1268	71	2.97101
RNHW12	Output_1_14	1.73	0.14	0.174	0.014	0.88215	5.74713	0.462413	0.0719	0.0041	0.25429	1031	63	1033	76	1000	94	0.193986
RNHW12	Output_1_16	2.12	0.18	0.191	0.015	0.88344	5.2356	0.411173	0.0802	0.0031	-0.060143	1146	60	1126	82	1189	79	1.7452
RNHW12	Output_1_17	2.55	0.25	0.218	0.02	0.9607	4.58716	0.42084	0.0837	0.0026	0.33374	1270	77	1260	110	1300	72	0.787402
RNHW12	Output_1_18	2.2	0.28	0.172	0.021	0.88282	5.81395	0.709843	0.0925	0.0061	-0.16777	1159	92	1020	120	1450	120	11.9931
RNHW12	Output_1_19	1.94	0.22	0.181	0.023	0.91909	5.52486	0.702054	0.0783	0.0033	0.20565	1081	75	1070	120	1143	82	1.01758
RNHW12	Output_1_20	1.6	0.15	0.1548	0.009	0.84391	6.45995	0.375578	0.0727	0.0038	0.01791	963	54	927	50	990	100	3.73832
RNHW12	Output_1_21	2.76	0.15	0.2249	0.0092	0.70911	4.44642	0.18189	0.0889	0.0034	-0.034136	1341	42	1307	49	1392	72	2.53542
RNHW12	Output_1_22	2.63	0.45	0.207	0.03	0.96193	4.83092	0.700133	0.089	0.0063	-0.77622	1260	150	1200	160	1370	150	4.7619
RNHW12	Output_1_23	1.82	0.23	0.174	0.02	0.8113	5.74713	0.660589	0.0772	0.0045	-0.33034	1060	110	1030	110	1140	150	2.83019
RNHW12	Output_1_24	1.87	0.14	0.18	0.014	0.96537	5.55556	0.432099	0.0768	0.0018	0.22142	1064	51	1062	79	1111	47	0.18797
RNHW12	Output_1_25	1.83	0.14	0.168	0.016	0.88521	5.95238	0.566893	0.0806	0.0031	0.44251	1047	53	999	86	1200	76	4.58453
RNHW12	Output_1_26	1.51	0.18	0.155	0.019	0.96401	6.45161	0.790843	0.0716	0.0024	-0.042365	948	61	930	110	964	72	1.89873
RNHW12	Output_1_27	1.3	0.11	0.138	0.012	0.92954	7.24638	0.63012	0.0691	0.0021	-0.1702	840	52	830	67	892	65	1.19048
RNHW12	Output_1_28	2.57	0.33	0.204	0.027	0.98328	4.90196	0.648789	0.0881	0.0021	0.10015	1260	110	1190	150	1379	45	5.55556
RNHW12	Output_1_29	1.73	0.21	0.156	0.017	0.95728	6.41026	0.698554	0.0743	0.0024	-0.26134	1003	81	932	95	1042	64	7.07876
RNHW12	Output_1_30	1.03	0.17	0.106	0.015	0.95526	9.43396	1.33499	0.0635	0.0031	-0.056528	698	82	647	87	700	110	7.30659
RNHW-11A	Output_1_1	4.26	0.71	0.255	0.022	0.8014	3.92157	0.338331	0.118	0.012	-0.41673	1630	140	1495	92	1870	170	8.28221
RNHW-11A	Output_1_3	1.616	0.069	0.151	0.01	0.90501	6.62252	0.438577	0.0757	0.0023	0.60565	974	27	905	57	1080	60	7.08419
RNHW-11A	Output_1_5	1.065	0.06	0.1148	0.0081	0.44617	8.7108	0.614612	0.0652	0.0022	0.33443	734	29	700	47	793	84	4.63215
RNHW-11A	Output_1_6	1.96	0.1	0.1859	0.0076	0.35228	5.37924	0.219915	0.0745	0.004	0.42032	1098	34	1099	41	1030	100	0.0910747
RNHW-11A	Output_1_7	2.65	0.31	0.225	0.02	0.86642	4.44444	0.395062	0.0823	0.0054	-0.3702	1293	94	1310	110	1220	150	1.31477
RNHW-11A	Output_1_8	3.15	0.29	0.252	0.024	0.72677	3.96825	0.377929	0.0872	0.0054	0.44402	1429	79	1440	130	1390	150	0.769769
RNHW-11A	Output_1_9	2.49	0.11	0.214	0.01	0.98367	4.6729	0.21836	0.0844	0.004	-0.044525	1267	30	1251	54	1285	88	1.26283
RNHW-11A	Output_1_10	3.46	0.25	0.26	0.028	0.14051	3.84615	0.414201	0.0935	0.0036	0.96579	1527	68	1530	120	1487	69	0.196464
RNHW-11A	Output_1_11	3.24	0.25	0.222	0.024	0.40404	4.5045	0.486974	0.1049	0.0061	0.80604	1458	58	1290	130	1692	99	11.5226
RNHW-11A	Output_1_12	2.5	0.22	0.221	0.021	0.94221	4.52489	0.429967	0.0822	0.0024	0.29566	1258	75	1280	110	1244	58	1.74881
RNHW-11A	Output_1_13	1.744	0.097	0.172	0.01	0.84326	5.81395	0.338021	0.0745	0.0022	0.28354	1021	37	1024	56	1047	60	0.29383
RNHW-11A	Output_1_14	1.75	0.17	0.169	0.015	0.93632	5.91716	0.525192	0.0761	0.0053	0.28402	1015	66	1005	85	1060	140	0.985222
RNHW-11A	Output_1_15	2.02	0.16	0.192	0.015	0.83707	5.20833	0.406901	0.0774	0.0033	0.16378	1113	55	1128	81	1116	86	1.34771
RNHW-11A	Output_1_16	2.1	0.3	0.196	0.026	0.9438	5.10204	0.676801	0.0776	0.0038	-0.40997	1120	100	1150	140	1120	96	2.67857
RNHW-11A	Output_1_17	2.28	0.33	0.199	0.032	0.91226	5.02513	0.80806	0.0869	0.0082	0.59208	1220	110	1160	170	1290	190	4.91803
RNHW-11A	Output_1_18	2.14	0.18	0.213	0.017	0.65855	4.69484	0.374705	0.0745	0.0054	0.45135	1152	60	1240	90	1020	140	7.63889
RNHW-11A	Output_1_19	2.27	0.2	0.213	0.018	0.8768	4.69484	0.396747	0.0779	0.0032	-0.036526	1193	63	1241	94	1131	83	4.02347
RNHW-11A	Output_1_20	2.09	0.19	0.197	0.017	0.90247	5.07614	0.438043	0.0775	0.0035	0.15365	1134	62	1158	93	1152	72	2.1164
RNHW-11A	Output_1_21	1.36	0.2	0.146	0.019	0.95683	6.84931	0.891349	0.0677	0.0032	-0.43063	852	90	870	110	840	100	2.11268
RNHW-11A	Output_1_22	2.22	0.14	0.211	0.011	0.79203	4.73934	0.247074	0.0777	0.003	0.17322	1182	42	1232	59	1128	80	4.23012
RNHW-11A	Output_1_23	2.84	0.31	0.23	0.022	0.79877	4.34783	0.415879	0.0916	0.006	-0.42561	1406	84	1330	110	1470	150	5.40541
RNHW-11A	Output_1_24	2.22	0.21	0.1979	0.0078	0.34417	5.05306	0.19916	0.0837	0.0076	0.0071577	1176	61	1163	42	1290	200	1.10544
RNHW-11A	Output_1_25	1.977	0.099	0.1892	0.0093	0.77169	5.28541	0.259801	0.0777	0.0026	0.30812	1105	35	1116	51	1130	65	0.995475
RNHW-11A	Output_1_26	2.54	0.25	0.246	0.032	0.92175	4.06504	0.528786	0.0781	0.0042	0.64852	1270	73	1410	160	1130	110	11.0236
RNHW-11A	Output_1_27	2.8	0.29	0.24	0.022	0.90154	4.16667	0.381944	0.0856	0.004	-0.19454	1340	76	1380	110	1314	90	2.98507
RNHW-11A	Output_1_28	2.09	0.17	0.204	0.018	0.88315	4.90196	0.432526	0.0754	0.0038	0.32464	1157	68	1230	120	1060	99	6.30942
RNHW-11A	Output_1_29	1.71	0.16	0.181	0.024	0.9201	5.52486	0.732578	0.0705	0.0035	0.70269	1003	58	1060	130	920	110	5.68295
RNHW-11A	Output_1_30	1.93	0.18	0.193	0.02	0.82813	5.18135	0.536927	0.0728	0.0041	0.31795	1079	63	1130	110	990	110	4.7266
RNHW-11A	Output_1_31	2.19	0.11	0.204	0.01	0.87589	4.90196	0.240292	0.0771	0.002	0.14257	1173	36	1195	53	1136	42	1.87553
RNHW-11A	Output_1_32	2.11	0.14	0.192	0.018	0.48228	5.20833	0.488281	0.0776	0.0047	0.89159	1146	44	1128	97	1110	110	1.57068
RNHW-11A	Output_1_33	1.49	0.18	0.159	0.016	0.9241	6.28931	0.632886	0.0667	0.0033	-0.40353	910	78	950	90	810	110	4.3956
RNHW-11A	Output_1_34	2.07	0.19	0.197	0.013	0.83959	5.07614	0.334974	0.0755	0.004	-0.32968	1127	67	1160	70	1060	110	2.92813
RNHW-11A	Output_1_35	1.77	0.2	0.181	0.02	0.84739	5.52486	0.610482	0.0714	0.0045	0.10644	1019	74	1070	110	940	130	5.00491
RNHW-11A	Output_1_36	2.35	0.36	0.199	0.029	0.81402	5.02513	0.732305	0.0873	0.0082	0.018718	1190	120	1160	160	1310	180	2.52101
RNHW-11A	Output_1_37	14.24	0.88	0.528	0.027	0.49893	1.89394	0.0968492	0.198	0.011	0.42181	2756	58	2730	110	2792	95	0.943396
RNHW-11A	Output_1_38	1.71	0.22	0.156	0.015	0.89331	6.41026	0.616371	0.0763	0.0048	-0.16196	992	86	933	83	1070	140	5.94758
RNHW-11A	Output_1_39	2.96	0.3	0.249	0.026	0.88083	4.01606	0.419348	0.0875	0.0043	0.28938	1380	83	1420	140	1354	94	2.89855
RNHW-11A	Output_1_40	1.83	0.13	0.182	0.013	0.85373	5.49451	0.392465	0.0754	0.0036	-0.094563	1068	58	1074	70	1061	95	0.561798
RNHW-11A	Output_1_41	1.39	0.12	0.129	0.013	0.76131	7.75194	0.781203	0.0775	0.0053	0.60968	879	52	777	74	1110	110	11.6041
RNHW-11A	Output_1_42	1.82	0.18	0.174	0.019	0.92446	5.74713	0.62756	0.0755	0.0028	0.11274	1040	69	1030	100	1071	73	0.961538
RNHW-11A	Output_1_43	2.37	0.26	0.2	0.019	0.78724	5	0.475	0.0852	0.0052	0.059328	1218	76	1170	100	1300	110	3.94089
RNHW-11A	Output_1_44	1.66	0.24	0.159	0.02	0.94794	6.28931	0.791108	0.0738	0.0038	-0.28918	970	100	950	110	1010	110	2.06186
RNHW-11A	Output_1_45	2.5	0.22	0.221	0.013	0.84915	4.52489	0.26617	0.0808	0.0042	-0.31634	1260	65	1284	70	1200	100	1.90476
RNHW-11A	Output_1_46	1.73	0.11	0.178	0.01	0.75152	5.61798	0.315617	0.0713	0.003	0.19493	1016	41	1055	57	951	83	3.83858
RNHW-11A	Output_1_47	1.82	0.12	0.181	0.012	0.83861	5.52486	0.366289	0.0747	0.0027	0.23098	1049	43	1068	63	1050	74	1.81125
RNHW-11A	Output_1_48	1.872	0.086	0.172	0.01	0.90377	5.81395	0.338021	0.0814	0.0023	0.72765	1069	31	1021	56	1226	54	4.49018
RNHW-11A	Output_1_49	1.579	0.099	0.163	0.012	0.79156	6.13497	0.451654	0.073	0.0034	0.52448	957	39	971	67	998	93	1.4629
RNHW-11A	Output_1_50	9.8	1.8	0.418	0.072	0.98064	2.39234	0.412079	0.169	0.01	-0.70825	2300	240	2210	340	2566	94	3.91304

## Sheet: RNHE 
Zircon batch	number	Final207_235	207_235_error	Final206_238	206_238_error	Rho_6_38vs7_35	Final238_206	238_206_error	Final207_206	207_206_error	Rho_38_6vs7_6	FinalAge207_235	207_235_error	FinalAge206_238	206_238_error	FinalAge207_206	207_206_error	% discordance
RNHE-2	Output_1_1	1.1	0.13	0.115	0.011	0.88156	8.69565	0.831758	0.0683	0.0033	0.027243	741	64	702	65	860	100	5.26316
RNHE-2	Output_1_2	2.52	0.1	0.19	0.02	0.14598	5.26316	0.554017	0.099	0.015	0.97204	1276	30	1120	110	1510	200	12.2257
RNHE-2	Output_1_3	1.49	0.11	0.15	0.012	0.95447	6.66667	0.533333	0.0717	0.0013	0.78877	921	50	900	70	974	38	2.28013
RNHE-2	Output_1_4	2.87	0.17	0.215	0.016	0.28035	4.65116	0.346133	0.0971	0.008	0.78872	1367	44	1250	85	1570	160	8.55889
RNHE-2	Output_1_5	3.55	0.4	0.248	0.022	0.95937	4.03226	0.3577	0.103	0.0037	-0.54912	1510	100	1420	120	1670	66	5.96026
RNHE-2	Output_1_6	1.77	0.28	0.165	0.019	0.91749	6.06061	0.697888	0.0758	0.0052	-0.53026	1000	110	980	110	1050	140	2
RNHE-2	Output_1_7	1.47	0.11	0.153	0.01	0.75127	6.53595	0.427186	0.0706	0.0035	0.21564	913	48	918	59	920	100	0.547645
RNHE-2	Output_1_8	2.6	0.16	0.226	0.012	0.93372	4.42478	0.234944	0.0846	0.0023	0.18827	1296	46	1310	66	1300	52	1.08025
RNHE-2	Output_1_9	1.2	0.2	0.114	0.013	0.57888	8.77193	1.00031	0.078	0.01	0.14979	780	89	694	74	1040	260	11.0256
RNHE-2	Output_1_10	1.597	0.086	0.1633	0.0088	0.95512	6.1237	0.329997	0.0708	0.0014	0.5026	966	34	974	49	948	40	0.828157
RNHE-2	Output_1_11	2.54	0.35	0.216	0.025	0.96044	4.62963	0.535837	0.0839	0.0039	-0.62277	1250	110	1250	130	1272	93	0
RNHE-2	Output_1_12	1.95	0.24	0.176	0.018	0.95728	5.68182	0.581095	0.0796	0.0036	-0.68157	1076	96	1040	100	1171	95	3.34572
RNHE-2	Output_1_13	2.01	0.11	0.201	0.011	0.68218	4.97512	0.272271	0.0729	0.0031	0.3852	1113	38	1180	60	996	87	6.01977
RNHE-2	Output_1_14	1.33	0.12	0.1372	0.0096	0.9208	7.28863	0.509992	0.0701	0.0021	-0.18402	852	51	828	55	924	63	2.8169
RNHE-2	Output_1_15	1.68	0.15	0.166	0.014	0.88397	6.0241	0.508056	0.0735	0.0029	0.063493	992	58	990	76	1013	83	0.201613
RNHE-2	Output_1_16	1.666	0.097	0.1675	0.0066	0.79725	5.97015	0.235242	0.0735	0.0027	0.52815	991	38	998	37	1017	74	0.706357
RNHE-2	Output_1_17	1.32	0.21	0.135	0.018	0.98342	7.40741	0.987654	0.0687	0.0022	-0.58772	830	100	810	100	880	65	2.40964
RNHE-2	Output_1_20	1.78	0.17	0.171	0.014	0.92086	5.84795	0.47878	0.0754	0.002	0.93905	1025	71	1012	76	1072	55	1.26829
RNHE-2	Output_1_21	1.29	0.1	0.128	0.011	0.87852	7.8125	0.671387	0.0743	0.005	0.97833	834	48	773	64	1020	110	7.31415
RNHE-2	Output_1_22	8.5	1.8	0.339	0.061	0.98779	2.94985	0.530799	0.161	0.013	-0.74568	2090	290	1830	310	2470	130	12.4402
RNHE-2	Output_1_24	1.7	0.1	0.1701	0.0088	0.66448	5.87889	0.30414	0.0708	0.0032	0.40161	1004	37	1011	49	935	91	0.697211
RNHE-2	Output_1_25	1.45	0.14	0.1536	0.0085	0.49694	6.51042	0.360277	0.0669	0.0055	0.012588	898	60	920	47	780	180	2.44989
RNHE-2	Output_1_26	1.6	0.14	0.154	0.014	0.7949	6.49351	0.590319	0.0726	0.0041	0.35821	961	57	920	81	980	120	4.26639
RNHE-2	Output_1_28	0.853	0.05	0.0966	0.0046	0.66636	10.352	0.492951	0.0626	0.0027	0.1024	624	28	594	27	678	90	4.80769
RNHE-2	Output_1_29	1.132	0.061	0.1205	0.0069	0.69569	8.29875	0.475198	0.0659	0.0021	0.58894	766	29	733	40	793	68	4.30809
RNHE-2	Output_1_30	0.905	0.055	0.0977	0.0053	0.094502	10.2354	0.555248	0.0666	0.004	0.35706	652	29	600	31	800	120	7.97546
RNHE-2	Output_1_31	1.43	0.11	0.146	0.0074	0.93937	6.84931	0.347157	0.0694	0.0019	-0.33562	898	46	878	42	905	56	2.22717
RNHE-2	Output_1_32	1.32	0.24	0.125	0.019	0.97674	8	1.216	0.0727	0.0036	-0.44213	810	110	750	110	980	100	7.40741
RNHE-2	Output_1_33	0.612	0.035	0.0709	0.0047	0.76059	14.1044	0.934987	0.0627	0.003	0.52846	483	22	441	28	682	96	8.69565
RNHE-2	Output_1_34	1.67	0.11	0.159	0.012	0.81182	6.28931	0.474665	0.0758	0.003	0.26961	991	45	951	64	1077	79	4.03633
RNHE-2	Output_1_35	1.06	0.14	0.111	0.011	0.83428	9.00901	0.892785	0.0682	0.0051	-0.2485	719	71	678	65	830	150	5.70236
RNHE-2	Output_1_36	1.47	0.12	0.15	0.011	0.89245	6.66667	0.488889	0.0707	0.0026	-0.1545	908	54	899	59	937	79	0.991189
RNHE-2	Output_1_37	1.91	0.18	0.186	0.019	0.87882	5.37634	0.549196	0.0752	0.0037	0.46245	1074	60	1090	100	1054	99	1.48976
RNHE-2	Output_1_38	1.82	0.12	0.171	0.013	0.80155	5.84795	0.444581	0.0784	0.0041	0.68166	1046	43	1013	71	1140	100	3.15488
RNHE-2	Output_1_39	1.653	0.088	0.1676	0.007	0.91706	5.96659	0.249201	0.0729	0.0016	0.75975	987	35	998	39	1006	44	1.11449
RNHE-2	Output_1_40	1.36	0.17	0.133	0.012	0.7875	7.5188	0.678388	0.0739	0.0053	-0.14035	854	76	804	70	1000	140	5.8548
RNHE-2	Output_1_41	1.41	0.15	0.155	0.016	0.84612	6.45161	0.665973	0.0669	0.0041	0.0054446	901	55	923	88	800	130	2.44173
RNHE-2	Output_1_42	1.68	0.12	0.1733	0.0095	0.50948	5.77034	0.31632	0.071	0.0045	0.24181	993	48	1029	53	920	150	3.62538
RNHE-1	Output_1_1	1.64	0.15	0.1767	0.0087	0.29806	5.65931	0.278642	0.069	0.0037	0.021102	976	62	1048	48	870	110	7.37705
RNHE-1	Output_1_2	1.71	0.12	0.181	0.012	0.78175	5.52486	0.366289	0.0665	0.0025	0.44188	1006	44	1073	67	810	78	6.66004
RNHE-1	Output_1_3	1.29	0.19	0.146	0.015	0.19099	6.84931	0.703697	0.069	0.01	0.55259	821	87	878	83	740	320	6.94275
RNHE-1	Output_1_4	1.91	0.14	0.191	0.011	0.46495	5.2356	0.301527	0.0713	0.0036	0.43825	1076	50	1127	58	940	100	4.73978
RNHE-1	Output_1_5	2.32	0.29	0.215	0.016	0.41992	4.65116	0.346133	0.0804	0.008	0.2522	1193	95	1252	86	1120	220	4.94552
RNHE-1	Output_1_6	1.43	0.22	0.145	0.015	0.85083	6.89655	0.713436	0.0707	0.0047	-0.15402	873	99	868	86	910	150	0.572738
RNHE-1	Output_1_7	1.03	0.19	0.0989	0.0086	0.30939	10.1112	0.879237	0.075	0.013	0.21176	696	95	607	50	890	400	12.7874
RNHE-1	Output_1_8	1.65	0.3	0.146	0.02	0.95418	6.84931	0.938262	0.0773	0.004	-0.31558	950	110	870	110	1110	100	8.42105
RNHE-1	Output_1_9	2.77	0.31	0.242	0.02	0.69015	4.13223	0.341507	0.0829	0.0045	0.34938	1352	72	1390	100	1240	110	2.81065
RNHE-1	Output_1_10	1.55	0.21	0.153	0.012	0.88052	6.53595	0.512623	0.0719	0.0036	-0.11786	929	89	913	68	960	100	1.72228
RNHE-1	Output_1_11	2.02	0.2	0.198	0.011	0.60882	5.05051	0.280584	0.0729	0.003	0.32558	1132	55	1163	58	997	83	2.73852
RNHE-1	Output_1_12	2.095	0.077	0.1927	0.0054	0.68151	5.18941	0.145422	0.0757	0.0035	0.77878	1145	25	1136	29	1069	87	0.786026
RNHE-1	Output_1_13	3.25	0.44	0.271	0.029	0.78826	3.69004	0.394875	0.0838	0.0071	0.25466	1440	100	1540	150	1230	180	6.94444
RNHE-1	Output_1_14	1.68	0.12	0.174	0.013	0.49439	5.74713	0.429383	0.068	0.0039	0.48921	996	47	1031	70	840	120	3.51406
RNHE-1	Output_1_15	2.04	0.13	0.193	0.011	0.86058	5.18135	0.29531	0.0728	0.0021	0.54228	1139	38	1136	57	1002	57	0.263389
RNHE-1	Output_1_16	3.11	0.31	0.217	0.015	0.21601	4.6083	0.318546	0.102	0.011	0.37527	1441	85	1262	77	1580	190	12.4219
RNHE-1	Output_1_17	2.05	0.19	0.197	0.01	0.38653	5.07614	0.257672	0.0729	0.0029	0.069239	1118	67	1159	56	997	78	3.66726
RNHE-1	Output_1_18	3.13	0.21	0.25	0.011	0.80403	4	0.176	0.0847	0.003	0.30023	1432	55	1437	57	1300	66	0.349162
RNHE-1	Output_1_19	1.74	0.18	0.17	0.011	0.72196	5.88235	0.380623	0.0692	0.0031	0.48777	1032	54	1011	61	883	96	2.03488
RNHE-1	Output_1_20	1.58	0.15	0.1592	0.0067	0.34993	6.28141	0.264356	0.07	0.0056	0.5423	970	51	952	37	880	160	1.85567
RNHE-1	Output_1_21	1.89	0.15	0.177	0.01	0.82806	5.64972	0.319193	0.0726	0.0033	0.44621	1069	53	1047	56	986	91	2.058
RNHE-1	Output_1_22	1.626	0.096	0.1653	0.006	0.62439	6.04961	0.219586	0.0671	0.0027	0.36952	976	36	985	33	825	84	0.922131
RNHE-1	Output_1_23	2.13	0.18	0.189	0.011	0.71779	5.29101	0.307942	0.0771	0.0035	0.19903	1149	56	1112	60	1107	94	3.22019
RNHE-1	Output_1_24	1.77	0.11	0.1755	0.0059	0.57332	5.69801	0.191557	0.0692	0.0023	-0.17337	1029	40	1042	33	894	70	1.26336
RNHE-1	Output_1_25	1.92	0.12	0.1786	0.0066	0.65339	5.5991	0.20691	0.0733	0.0033	0.35084	1083	41	1059	36	1004	93	2.21607
RNHE-1	Output_1_26	1.753	0.097	0.1697	0.0052	0.63894	5.89275	0.180567	0.0707	0.0025	0.29049	1024	37	1010	29	938	74	1.36719
RNHE-1	Output_1_27	11.7	0.51	0.436	0.011	0.54921	2.29358	0.0578655	0.1798	0.0062	0.38432	2576	40	2333	49	2643	57	9.43323
RNHE-1	Output_1_28	2.1	0.13	0.1912	0.0053	0.68759	5.23013	0.144977	0.0767	0.0032	0.19248	1142	42	1128	29	1097	84	1.22592
RNHE-1	Output_1_29	2.02	0.19	0.191	0.011	0.74528	5.2356	0.301527	0.0781	0.006	0.29146	1132	54	1125	62	1150	130	0.618375
RNHE-1	Output_1_30	1.57	0.11	0.1703	0.0085	0.12199	5.87199	0.293082	0.0688	0.0026	-0.15057	955	43	1013	47	882	78	6.0733
RNHE-1	Output_1_31	2.04	0.19	0.198	0.012	0.76565	5.05051	0.306091	0.0762	0.0052	0.61885	1141	53	1164	66	1060	130	2.01578
RNHE-1	Output_1_32	2.05	0.18	0.194	0.012	0.60396	5.15464	0.318844	0.0771	0.0036	0.46394	1143	48	1138	66	1106	93	0.437445
RNHE3	Output_1_1	1.511	0.055	0.1389	0.005	0.77988	7.19942	0.259159	0.0793	0.0017	0.35337	933	22	838	28	1175	42	10.1822
RNHE3	Output_1_3	2.424	0.063	0.2254	0.0044	0.34999	4.43656	0.0866054	0.0798	0.0017	0.38957	1249	18	1310	23	1188	44	4.88391
RNHE3	Output_1_4	1.585	0.089	0.159	0.011	0.43015	6.28931	0.435109	0.0734	0.0039	0.80675	961	35	948	60	1005	97	1.35276
RNHE3	Output_1_5	1.477	0.081	0.1577	0.0032	0.11278	6.34115	0.128673	0.07	0.0038	0.15416	918	33	944	18	900	110	2.83224
RNHE3	Output_1_6	2.15	0.11	0.184	0.01	0.93095	5.43478	0.295369	0.0871	0.0018	0.59491	1162	38	1085	56	1359	39	6.62651
RNHE3	Output_1_7	4.02	0.14	0.2712	0.0053	0.57019	3.68732	0.0720604	0.1062	0.0027	0.38912	1636	29	1556	33	1729	47	4.88998
RNHE3	Output_1_8	2.68	0.29	0.206	0.021	0.94112	4.85437	0.494863	0.0956	0.0035	-0.11347	1305	75	1200	110	1530	72	8.04598
RNHE3	Output_1_10	3.35	0.19	0.2737	0.0085	0.69523	3.65363	0.113467	0.0877	0.004	0.16157	1487	43	1559	43	1361	88	4.84196
RNHE3	Output_1_11	3.26	0.19	0.27	0.016	0.75384	3.7037	0.219479	0.0874	0.0037	0.24687	1465	45	1539	82	1356	80	5.05119
RNHE3	Output_1_12	2.1	0.45	0.168	0.014	0.39187	5.95238	0.496032	0.081	0.012	0.060839	1100	130	996	78	1160	310	9.45455
RNHE3	Output_1_13	1.84	0.12	0.179	0.013	0.69592	5.58659	0.40573	0.0747	0.0042	0.59149	1055	43	1061	72	1040	110	0.56872
RNHE3	Output_1_14	1.84	0.12	0.179	0.013	0.69592	5.58659	0.40573	0.0747	0.0042	0.59149	1055	43	1061	72	1040	110	0.56872
RNHE3	Output_1_15	2.9	1.3	0.201	0.039	0.90893	4.97512	0.965323	0.1	0.02	-0.45861	1270	240	1160	200	1390	320	8.66142
RNHE3	Output_1_16	2.97	0.38	0.242	0.03	0.88774	4.13223	0.51226	0.0893	0.0056	0.38147	1373	95	1380	160	1380	120	0.509832
RNHE3	Output_1_17	3.23	0.14	0.244	0.0077	0.33184	4.09836	0.129333	0.0951	0.0041	0.35642	1460	34	1407	40	1515	83	3.63014
RNHE3	Output_1_18	3.221	0.093	0.2426	0.0054	0.52626	4.12201	0.0917513	0.0946	0.0026	0.50673	1461	22	1400	28	1514	50	4.17522
RNHE4	Output_1_1	2.27	0.16	0.2086	0.0081	0.36634	4.79386	0.186147	0.0795	0.0048	0.36863	1196	49	1221	43	1150	120	2.0903
RNHE4	Output_1_2	2.78	0.11	0.2209	0.0078	0.87277	4.52693	0.159847	0.0913	0.0024	0.53893	1358	37	1286	41	1447	50	5.30191
RNHE4	Output_1_3	1.813	0.075	0.1657	0.0033	0.39658	6.035	0.12019	0.0781	0.0025	0.1717	1048	28	988	18	1139	63	5.72519
RNHE4	Output_1_4	2.023	0.085	0.1773	0.0038	0.24975	5.64016	0.120883	0.0794	0.0027	0.28398	1121	28	1052	21	1195	79	6.15522
RNHE4	Output_1_5	1.867	0.059	0.1694	0.0025	-0.07845	5.90319	0.0871191	0.0768	0.0025	0.52667	1068	21	1008	14	1108	63	5.61798
RNHE4	Output_1_7	2.07	0.13	0.191	0.012	0.82368	5.2356	0.328938	0.0777	0.0029	0.35963	1133	43	1122	64	1128	73	0.970874
RNHE4	Output_1_9	2.38	0.13	0.2088	0.0061	0.73279	4.78927	0.139916	0.0824	0.0038	-0.17225	1244	45	1222	33	1236	94	1.76849
RNHE4	Output_1_10	1.684	0.059	0.1644	0.005	0.91999	6.08272	0.184998	0.0739	0.0015	0.22871	1001	23	981	28	1035	42	1.998
RNHE4	Output_1_11	0.907	0.049	0.1069	0.006	0.85533	9.35454	0.525044	0.0617	0.0025	0.32262	654	26	654	35	648	86	0
RNHE4	Output_1_12	2.1	0.11	0.2031	0.009	0.61812	4.92368	0.218184	0.0751	0.0033	0.30995	1145	36	1191	48	1054	90	4.01747
RNHE4	Output_1_13	2.18	0.14	0.203	0.011	0.29113	4.92611	0.266932	0.078	0.0053	0.50644	1168	46	1188	61	1110	140	1.71233
RNHE4	Output_1_14	2.31	0.14	0.203	0.014	0.7324	4.92611	0.339732	0.0823	0.0039	0.36458	1210	45	1190	73	1234	93	1.65289

## Sheet: E79
Zircon batch	number	Final207_235	207_235_error	Final206_238	206_238_error	Rho_6_38vs7_35	Final238_206	238_206_error	Final207_206	207_206_error	Rho_38_6vs7_6	FinalAge207_235	207_235_error	FinalAge206_238	206_238_error	FinalAge207_206	207_206_error	% discordance
E79-01A	Output_1_2	3.09	0.47	0.265	0.032	0.95487	3.77359	0.455678	0.082	0.003	-0.29899	1370	150	1500	160	1233	74	9.48905
E79-01A	Output_1_5	2.08	0.15	0.182	0.01	0.90713	5.49451	0.301896	0.0788	0.003	0.90329	1132	54	1075	58	1155	71	5.03534
E79-01A	Output_1_6	2.1	0.16	0.177	0.014	0.86536	5.64972	0.44687	0.0783	0.0029	0.82678	1138	63	1047	81	1142	72	7.99649
E79-01A	Output_1_7	1.91	0.26	0.163	0.014	0.83153	6.13497	0.52693	0.0794	0.0037	-0.068525	1081	95	970	80	1162	92	10.2683
E79-01A	Output_1_9	0.94	0.21	0.095	0.011	0.89342	10.5263	1.21884	0.0645	0.0049	-0.46345	630	110	585	67	710	150	7.14286
E79-01A	Output_1_11	2.03	0.33	0.173	0.018	0.78989	5.78035	0.601423	0.0817	0.0073	0.40432	1080	130	1060	120	1180	170	1.85185
E79-01A	Output_1_12	1.35	0.25	0.133	0.018	0.65003	7.5188	1.01758	0.0736	0.008	0.3921	830	110	800	100	930	220	3.61446
E79-01A	Output_1_13	2.02	0.13	0.1735	0.0076	0.69789	5.76369	0.252473	0.0819	0.0029	0.83789	1116	46	1031	42	1231	68	7.61649
E79-01A	Output_1_14	1.37	0.21	0.13	0.013	0.90633	7.69231	0.769231	0.069	0.0033	-0.57622	850	100	786	74	880	100	7.52941
E79-01A	Output_1_15	0.72	0.058	0.0852	0.0058	0.69305	11.7371	0.799004	0.0575	0.0025	0.36347	547	34	526	35	492	89	3.83912
E79-01A	Output_1_16	1.45	0.23	0.146	0.017	0.98223	6.84931	0.797523	0.0697	0.0025	-0.42403	870	110	876	95	905	75	0.689655
E79-01A	Output_1_17	1.47	0.23	0.148	0.018	0.96194	6.75676	0.821768	0.0733	0.0025	0.58594	880	110	890	100	1010	73	1.13636
E79-01A	Output_1_18	1.46	0.18	0.149	0.012	0.91234	6.71141	0.540516	0.0764	0.0041	0.70272	891	88	891	72	1082	98	0
E79-01A	Output_1_19	1.66	0.21	0.165	0.01	0.83296	6.06061	0.36731	0.0783	0.0042	0.18551	993	79	984	58	1164	95	0.906344
E79-01A	Output_1_20	1.56	0.15	0.149	0.013	0.95904	6.71141	0.585559	0.0768	0.0034	0.83525	942	64	895	72	1104	72	4.98938
E79-01A	Output_1_21	1.11	0.21	0.114	0.016	0.9816	8.77193	1.23115	0.0713	0.0062	0.58589	720	110	692	93	920	130	3.88889
E79-01A	Output_1_23	1.68	0.26	0.141	0.017	0.99021	7.0922	0.855088	0.084	0.0033	0.57199	960	110	845	96	1281	61	11.9792
E79-01A	Output_1_27	0.82	0.16	0.093	0.011	0.98191	10.7527	1.27182	0.0625	0.0031	0.46727	584	83	570	67	670	100	2.39726
E79-01A	Output_1_28	1.52	0.38	0.144	0.025	0.99275	6.94444	1.20563	0.0738	0.0044	-0.84682	850	170	860	140	1000	130	1.17647
E79-01A	Output_1_29	1.41	0.072	0.14	0.0085	0.72125	7.14286	0.433673	0.0833	0.009	0.83744	890	30	844	48	1200	160	5.16854
E79-01A	Output_1_30	0.81	0.12	0.1046	0.0084	0.86798	9.56023	0.767743	0.0628	0.0031	0.23706	587	70	640	49	680	110	9.02896
E79-01A	Output_1_31	0.739	0.081	0.1004	0.0055	0.88655	9.96016	0.545626	0.0617	0.0026	0.88762	553	52	616	32	646	88	11.3924
E79-01A	Output_1_32	1.46	0.2	0.164	0.015	0.90393	6.09756	0.557704	0.0694	0.0023	0.1376	885	97	974	81	922	83	10.0565
E79-01B	Output_1_1	0.912	0.051	0.1072	0.0068	0.35662	9.32836	0.591724	0.0724	0.0056	0.79468	656	27	655	40	990	160	0.152439
E79-01B	Output_1_2	0.835	0.077	0.1	0.011	0.7395	10	1.1	0.0703	0.0044	0.7317	611	41	612	62	1010	190	0.163666
E79-01B	Output_1_3	1.04	0.2	0.099	0.015	0.86166	10.101	1.53046	0.085	0.012	0.23961	690	100	607	91	1190	210	12.029
E79-01B	Output_1_4	1.35	0.21	0.141	0.016	0.94002	7.0922	0.804789	0.0694	0.0034	-0.64269	830	100	847	92	880	110	2.04819
E79-20	Output_1_1	2.021	0.081	0.199	0.0065	0.89861	5.02513	0.164137	0.0753	0.0013	0.44482	1120	27	1169	35	1074	34	4.375
E79-20	Output_1_2	7.7	1.5	0.35	0.057	0.99428	2.85714	0.465306	0.155	0.012	-0.84438	2040	260	1890	290	2400	140	7.35294
E79-20	Output_1_3	0.81	0.17	0.095	0.014	0.99105	10.5263	1.55125	0.0614	0.0035	-0.83667	576	90	582	81	620	120	1.04167
E79-20	Output_1_4	1.06	0.19	0.126	0.017	0.981	7.93651	1.0708	0.0619	0.0033	-0.73022	708	93	758	96	640	120	7.06215
E79-20	Output_1_5	1.624	0.058	0.1728	0.0059	0.90323	5.78704	0.19759	0.071	0.0012	0.49303	978	22	1027	33	954	35	5.01022
E79-20	Output_1_6	2.14	0.22	0.194	0.019	0.86661	5.15464	0.504836	0.0798	0.0027	0.16549	1172	65	1140	100	1181	70	2.73038
E79-20	Output_1_7	1.06	0.21	0.114	0.017	0.98508	8.77193	1.3081	0.0649	0.0037	-0.75099	700	110	691	99	740	120	1.28571
E79-20	Output_1_8	1.99	0.38	0.179	0.03	0.98397	5.58659	0.9363	0.0775	0.0044	-0.83474	1050	150	1050	170	1150	100	0
E79-20	Output_1_9	1.38	0.14	0.15	0.014	0.88133	6.66667	0.622222	0.0663	0.0028	0.12457	870	62	900	78	799	91	3.44828
E79-20	Output_1_10	1.63	0.28	0.165	0.022	0.96965	6.06061	0.808081	0.0671	0.0041	-0.78163	950	120	980	120	810	130	3.15789
E79-20	Output_1_11	2.56	0.16	0.193	0.015	0.73951	5.18135	0.402695	0.0854	0.0045	0.54258	1283	47	1135	81	1300	100	11.5355
E79-20	Output_1_12	3.23	0.2	0.257	0.013	0.85546	3.89105	0.196824	0.0864	0.003	0.29156	1459	47	1499	83	1337	68	2.7416
E79-20	Output_1_13	1.66	0.14	0.161	0.013	0.93629	6.21118	0.501524	0.0717	0.0022	0.31699	983	57	962	71	970	61	2.13632
E79-20	Output_1_14	1.52	0.15	0.153	0.016	0.86494	6.53595	0.683498	0.0685	0.0027	0.25374	945	58	914	93	870	83	3.28042
E79-20	Output_1_15	2.09	0.33	0.183	0.027	0.90307	5.46448	0.806235	0.0782	0.0051	0.84527	1110	120	1070	150	1120	130	3.6036
E79-20	Output_1_16	0.715	0.046	0.0914	0.0048	0.87476	10.9409	0.574578	0.0548	0.0017	-0.09855	545	28	563	29	395	69	3.30275
E79-20	Output_1_17	2.5	0.25	0.213	0.017	0.97393	4.69484	0.374705	0.0828	0.0023	-0.76269	1253	84	1238	89	1257	55	1.19713
E79-20	Output_1_18	1.2	0.12	0.122	0.012	0.97867	8.19672	0.806235	0.0702	0.002	0.64371	793	55	737	70	928	55	7.06179
E79-20	Output_1_19	1.6	0.21	0.151	0.016	0.9836	6.62252	0.701724	0.0733	0.0027	-0.72213	946	96	905	91	1010	78	4.33404
E79-20	Output_1_20	2.23	0.51	0.186	0.035	0.99428	5.37634	1.01168	0.0805	0.0052	-0.76963	1100	180	1080	200	1170	140	1.81818
E79-20	Output_1_21	1.55	0.26	0.152	0.021	0.96609	6.57895	0.908933	0.072	0.0039	-0.6032	910	110	900	120	1001	92	1.0989
E79-20	Output_1_22	1.1	0.17	0.118	0.015	0.99095	8.47458	1.07728	0.066	0.0033	-0.84044	729	93	713	90	819	97	2.19479
E79-20	Output_1_23	1.341	0.053	0.1278	0.0045	0.6614	7.82473	0.275518	0.0689	0.0019	0.79321	862	23	775	26	887	57	10.0928
E79-20	Output_1_24	1.64	0.25	0.167	0.022	0.98722	5.98802	0.788841	0.0707	0.0026	-0.82179	950	110	990	120	937	79	4.21053
E79-20	Output_1_25	0.72	0.048	0.0878	0.0042	0.44988	11.3895	0.544829	0.0592	0.0024	0.25213	548	28	542	25	558	92	1.09489
E79-20	Output_1_26	1.1	0.18	0.124	0.018	0.88257	8.06452	1.17066	0.0646	0.0042	-0.29218	729	91	750	100	720	140	2.88066
E79-20	Output_1_27	8	1.9	0.359	0.077	0.98687	2.78552	0.59745	0.143	0.02	-0.92549	1960	360	1910	380	2060	370	2.55102
E79-20	Output_1_28	2.42	0.17	0.209	0.014	0.88456	4.78469	0.320505	0.0848	0.0028	-0.066128	1260	41	1223	74	1303	64	2.93651
E79-20	Output_1_29	1.4	0.29	0.142	0.024	0.92505	7.04225	1.19024	0.0753	0.0066	-0.22942	880	130	850	130	1020	170	3.40909
E79-20	Output_1_30	2.74	0.13	0.228	0.011	0.65579	4.38596	0.211604	0.0844	0.0041	0.59115	1334	37	1321	58	1284	95	0.974513
E79-20	Output_1_31	2.56	0.41	0.225	0.032	0.95027	4.44444	0.632099	0.0785	0.0046	-0.42097	1240	130	1300	170	1130	120	4.83871
E79-20	Output_1_32	2.05	0.22	0.199	0.022	0.7603	5.02513	0.555542	0.0739	0.0052	0.43655	1118	71	1160	120	1000	140	3.75671
E79-20	Output_1_33	1.72	0.29	0.182	0.026	0.88802	5.49451	0.784929	0.066	0.0053	-0.032735	980	110	1070	140	750	170	9.18367
E79-20	Output_1_34	1.48	0.24	0.147	0.022	0.95287	6.80272	1.01809	0.0695	0.0033	-0.32715	890	110	880	130	890	100	1.1236
E79-20	Output_1_35	2.33	0.41	0.203	0.031	0.89575	4.92611	0.752263	0.0773	0.0051	-0.21124	1170	130	1180	160	1140	160	0.854701
E79-20	Output_1_36	2.15	0.3	0.204	0.03	0.93562	4.90196	0.720877	0.0762	0.0043	0.13537	1130	100	1180	160	1080	110	4.42478
E79-20	Output_1_37	12.7	1.5	0.567	0.081	0.87558	1.76367	0.251953	0.173	0.011	0.16721	2650	140	2840	330	2560	110	7.16981
E79-20	Output_1_38	2.21	0.57	0.193	0.044	0.91626	5.18135	1.18124	0.0786	0.0098	-0.4511	1090	190	1120	230	1050	240	2.75229
E79-20	Output_1_39	2.45	0.4	0.222	0.029	0.90322	4.5045	0.588426	0.0799	0.0053	-0.10208	1220	110	1280	150	1160	120	4.91803
E79-20	Output_1_40	1.84	0.4	0.17	0.025	0.91734	5.88235	0.865052	0.0697	0.0062	-0.18911	1000	140	1000	140	910	210	0
E79-20	Output_1_41	3.02	0.39	0.248	0.032	0.87981	4.03226	0.520291	0.0905	0.0064	0.49636	1388	88	1420	160	1400	130	2.30548
E79-20	Output_1_42	0.86	0.14	0.1033	0.0099	0.9481	9.68054	0.927758	0.0586	0.0041	-0.67245	612	74	632	58	510	150	3.26797
E79-20	Output_1_43	2.69	0.28	0.227	0.021	0.87436	4.40529	0.407537	0.086	0.004	0.080218	1308	82	1310	110	1323	88	0.152905
E79-20	Output_1_44	2.49	0.14	0.227	0.013	0.68408	4.40529	0.252285	0.0799	0.0033	0.36936	1265	41	1317	68	1179	88	4.11067
E79-20	Output_1_45	2.93	0.23	0.253	0.021	0.89558	3.95257	0.328079	0.0846	0.0035	0.6258	1381	56	1450	110	1294	80	4.99638
E79-20	Output_1_46	2.14	0.18	0.206	0.01	0.82724	4.85437	0.235649	0.0748	0.0035	-0.31388	1153	56	1204	55	1077	77	4.42324
E79-20	Output_1_47	2.34	0.38	0.213	0.03	0.90151	4.69484	0.661245	0.0799	0.0055	0.18621	1180	120	1230	160	1160	130	4.23729
E79-20	Output_1_48	3.2	0.45	0.259	0.027	0.89112	3.861	0.402498	0.0867	0.0034	-0.21186	1430	100	1480	140	1341	74	3.4965
E79-5	Output_1_1	8.72	0.44	0.417	0.024	0.86701	2.39808	0.138019	0.1498	0.0043	0.39105	2304	46	2240	110	2339	49	2.77778
E79-5	Output_1_2	1.31	0.07	0.1457	0.0072	0.70165	6.86342	0.339167	0.0644	0.0025	0.27923	847	30	876	40	740	84	3.42385
E79-5	Output_1_3	2.51	0.26	0.231	0.023	0.82694	4.329	0.431026	0.0784	0.0046	0.079396	1259	78	1330	120	1130	110	5.6394
E79-5	Output_1_4	1.47	0.17	0.161	0.02	0.93304	6.21118	0.771575	0.0665	0.0033	0.38364	906	70	950	110	800	110	4.85651
E79-5	Output_1_5	1.87	0.11	0.1885	0.0099	0.74891	5.30504	0.27862	0.0712	0.0029	0.05878	1067	41	1112	54	949	86	4.21743
E79-5	Output_1_6	1.319	0.076	0.1575	0.0084	0.59561	6.34921	0.338624	0.0603	0.0029	0.30079	851	33	942	46	590	100	10.6933
E79-5	Output_1_7	1.714	0.066	0.1911	0.0086	0.73432	5.23286	0.235492	0.0646	0.0019	0.45724	1012	24	1126	46	753	64	11.2648
E79-5	Output_1_8	1.533	0.089	0.1654	0.007	0.7033	6.04595	0.255875	0.0665	0.0027	-0.071568	940	35	986	39	808	89	4.89362
E79-5	Output_1_9	1.18	0.14	0.14	0.014	0.98764	7.14286	0.714286	0.0596	0.0022	-0.89312	777	70	840	78	576	87	8.10811
E79-5	Output_1_10	3.27	0.13	0.274	0.011	0.80681	3.64963	0.146518	0.0858	0.0022	0.25994	1471	30	1560	56	1329	47	6.05031
E79-5	Output_1_11	2.9	0.23	0.257	0.017	0.97766	3.89105	0.257385	0.0808	0.0022	-0.73151	1395	50	1501	72	1230	43	7.59857
E79-5	Output_1_12	1.47	0.13	0.179	0.018	0.91985	5.58659	0.56178	0.0599	0.0026	0.33777	912	55	1060	100	585	89	16.2281
E79-5	Output_1_13	2.08	0.1	0.2185	0.0092	0.83293	4.57666	0.192701	0.0687	0.0021	-0.037736	1140	35	1273	49	883	63	11.6667
E79-6	Output_1_1	1.9	0.1	0.206	0.01	0.66018	4.85437	0.235649	0.0674	0.0028	0.27955	1078	35	1207	55	836	82	11.9666
E79-6	Output_1_2	2.59	0.18	0.253	0.021	0.7838	3.95257	0.328079	0.0739	0.0033	0.68846	1290	51	1450	110	1023	92	12.4031
E79-6	Output_1_3	1.91	0.16	0.203	0.017	0.91837	4.92611	0.412531	0.0681	0.0025	0.13495	1076	56	1190	92	861	75	10.5948
E79-6	Output_1_4	0.551	0.025	0.0816	0.0046	0.82437	12.2549	0.69084	0.0491	0.0015	0.68082	445	16	505	27	144	71	13.4831
E79-6	Output_1_5	2.43	0.22	0.23	0.02	0.9575	4.34783	0.378072	0.0763	0.0019	-0.085976	1240	68	1330	110	1097	49	7.25806
E79-6	Output_1_6	1.64	0.19	0.157	0.016	0.87441	6.36943	0.649114	0.0746	0.0037	-0.12471	972	75	937	89	1039	98	3.60082
E79-6	Output_1_7	3.08	0.16	0.257	0.012	0.8257	3.89105	0.181683	0.0856	0.0026	0.30647	1424	40	1472	64	1323	56	3.37079
E79-6	Output_1_8	0.648	0.035	0.0877	0.0044	0.74556	11.4025	0.572076	0.0527	0.002	0.21917	506	21	542	26	304	84	7.11462
E79-6	Output_1_9	1.485	0.047	0.1583	0.0049	0.74258	6.31712	0.195539	0.0667	0.0016	0.33144	923	19	947	28	821	48	2.60022
E79-6	Output_1_10	1.59	0.36	0.16	0.027	0.96672	6.25	1.05469	0.066	0.0059	-0.74698	910	150	950	150	750	200	4.3956
E79-6	Output_1_11	1.2	0.15	0.151	0.012	0.71334	6.62252	0.526293	0.0558	0.005	-0.22303	786	72	906	69	390	190	15.2672
E79-6	Output_1_12	6.4	1.4	0.306	0.06	0.92861	3.26797	0.640779	0.144	0.014	-0.38368	1910	220	1680	290	2280	150	12.0419
E79-6	Output_1_13	2.55	0.44	0.216	0.034	0.94392	4.62963	0.728738	0.0815	0.0063	-0.57074	1230	150	1250	180	1190	170	1.62602
E79-6	Output_1_14	0.839	0.089	0.1014	0.0088	0.77201	9.86193	0.855868	0.059	0.0036	0.0096943	612	49	621	52	540	130	1.47059
E79-6	Output_1_15	3.28	0.3	0.297	0.035	0.80858	3.367	0.396785	0.0809	0.0054	0.61259	1461	72	1660	170	1190	130	13.6208
E79-6	Output_1_16	2.17	0.25	0.204	0.02	0.9147	4.90196	0.480584	0.0758	0.0036	-0.3749	1153	89	1190	110	1073	96	3.20902
E79-6	Output_1_17	2.19	0.25	0.206	0.021	0.85766	4.85437	0.494863	0.0762	0.0043	-0.17875	1159	85	1200	110	1080	120	3.53753
E79-6	Output_1_18	1.59	0.19	0.178	0.017	0.90857	5.61798	0.536548	0.0639	0.0033	-0.45259	952	80	1050	95	720	110	10.2941
E79-6	Output_1_19	2.02	0.11	0.2152	0.0098	0.83505	4.64684	0.211613	0.0677	0.0021	0.017883	1118	38	1255	52	849	65	12.254
E79-6	Output_1_21	1.56	0.31	0.168	0.024	0.97942	5.95238	0.85034	0.0636	0.0047	-0.88723	910	130	990	130	680	170	8.79121
E79-6	Output_1_22	2.006	0.096	0.206	0.011	0.82732	4.85437	0.259214	0.0708	0.0021	0.51817	1115	33	1208	62	945	60	8.34081
E79-6	Output_1_23	2.95	0.15	0.261	0.016	0.75291	3.83142	0.234876	0.0823	0.0031	0.47734	1392	39	1495	80	1242	74	7.39943
E79-6	Output_1_24	1.549	0.092	0.1715	0.0087	0.85796	5.8309	0.295795	0.0654	0.0019	0.14871	946	37	1020	48	780	62	7.82241
E79-6	Output_1_25	1.785	0.074	0.1938	0.0081	0.94378	5.15996	0.215664	0.0667	0.001	-0.073529	1038	27	1141	44	826	32	9.92293
E79-6	Output_1_26	2.56	0.1	0.2401	0.0097	0.92909	4.16493	0.168263	0.0768	0.0014	-0.12076	1286	30	1386	50	1114	36	7.77605
E79-6	Output_1_27	2.699	0.085	0.243	0.011	0.74055	4.11523	0.186286	0.0804	0.0024	0.66695	1327	23	1401	57	1199	60	5.57649
E79-6	Output_1_28	1.569	0.077	0.1672	0.0051	0.46376	5.98086	0.182431	0.0674	0.0029	0.23053	955	30	997	28	833	92	4.39791
E79-6	Output_1_29	1.87	0.066	0.1845	0.0051	0.61888	5.42005	0.149823	0.0728	0.0019	0.16435	1069	24	1091	28	1001	54	2.058
E79-6	Output_1_30	1.862	0.09	0.1898	0.0098	0.68436	5.2687	0.272041	0.0709	0.0029	0.47829	1065	32	1119	53	941	85	5.07042
E79-6	Output_1_31	1.032	0.098	0.117	0.011	0.82332	8.54701	0.803565	0.064	0.0035	0.17861	714	48	711	63	720	120	0.420168
E79-6	Output_1_32	1.606	0.098	0.173	0.014	0.79927	5.78035	0.467774	0.0696	0.0035	0.51123	983	47	1024	79	900	110	4.17091
E79-6	Output_1_33	2.14	0.24	0.204	0.015	0.55178	4.90196	0.360438	0.076	0.0068	0.11796	1145	77	1197	79	1100	160	4.54148

## Sheet: PB18-9
Zircon batch	number	Final207_235	207_235_error	Final206_238	206_238_error	Rho_6_38vs7_35	Final238_206	238_206_error	Final207_206	207_206_error	Rho_38_6vs7_6	FinalAge207_235	207_235_error	FinalAge206_238	206_238_error	FinalAge207_206	207_206_error	% discordance
B18-9-2	Output_1_1	2.58	0.29	0.21	0.021	0.90901	4.7619	0.476191	0.0851	0.0034	-0.36309	1306	80	1260	91	1305	81	3.52221
B18-9-2	Output_1_2	2.18	0.13	0.199	0.012	0.63931	5.02513	0.303023	0.0771	0.0021	0.51675	1169	42	1166	67	1118	53	0.25663
B18-9-2	Output_1_3	2.22	0.12	0.2011	0.0098	0.86682	4.97265	0.242327	0.0793	0.0022	0.019474	1182	39	1180	53	1174	55	0.169205
B18-9-2	Output_1_4	1.24	0.19	0.132	0.017	0.94978	7.57576	0.975666	0.0668	0.0033	-0.4379	797	90	800	100	810	100	0.376412
B18-9-2	Output_1_5	1.537	0.099	0.162	0.013	0.79594	6.17284	0.495351	0.07	0.0037	0.6266	941	40	966	74	910	100	2.65675
B18-9-2	Output_1_6	3.46	0.18	0.277	0.013	0.84406	3.61011	0.169428	0.0921	0.0024	0.15462	1514	39	1572	64	1463	51	3.83091
B18-9-2	Output_1_7	2.25	0.1	0.2124	0.0096	0.68155	4.7081	0.212795	0.0784	0.0027	0.40431	1193	31	1241	51	1147	68	4.02347
B18-9-2	Output_1_8	2.03	0.21	0.201	0.019	0.96176	4.97512	0.470285	0.0742	0.0024	-0.57002	1136	63	1170	100	1062	51	2.99296
B18-9-2	Output_1_9	1.165	0.067	0.1279	0.0096	0.74734	7.81861	0.586854	0.0686	0.0034	0.59181	782	31	774	54	868	98	1.02302
B18-9-2	Output_1_10	1.916	0.06	0.192	0.006	0.70549	5.20833	0.16276	0.0745	0.0018	0.37912	1086	21	1132	32	1051	48	4.23573
B18-9-2	Output_1_11	3.01	0.12	0.255	0.0084	0.68721	3.92157	0.129181	0.0883	0.0027	0.17618	1407	30	1463	43	1382	57	3.9801
B18-9-2	Output_1_12	2.082	0.083	0.207	0.0066	0.5709	4.83092	0.154029	0.0757	0.0026	0.27726	1141	28	1212	35	1077	72	6.22261
B18-9-2	Output_1_13	1.4	0.14	0.141	0.012	0.89485	7.0922	0.603591	0.0743	0.0031	0.026313	879	56	850	69	1035	87	3.2992
B18-9-2	Output_1_14	1.554	0.085	0.1629	0.0081	0.79576	6.13873	0.305241	0.0718	0.0025	0.15432	949	34	972	45	971	71	2.4236
B18-9-2	Output_1_15	1.97	0.14	0.191	0.011	0.93587	5.2356	0.301527	0.0799	0.0022	0.49616	1115	41	1124	60	1187	55	0.807175
B18-9-2	Output_1_16	1.729	0.071	0.1782	0.0076	0.62027	5.61167	0.239331	0.0731	0.0026	0.43073	1017	26	1057	41	1007	72	3.93314
B18-9-2	Output_1_17	2.81	0.11	0.238	0.01	0.82835	4.20168	0.176541	0.0888	0.0021	0.43714	1357	28	1377	53	1394	45	1.47384
B18-9-2	Output_1_18	2.077	0.076	0.2025	0.0068	0.96811	4.93827	0.165828	0.0763	0.0023	0.5922	1140	25	1188	36	1096	61	4.21053
B18-9-2	Output_1_19	1.625	0.056	0.1673	0.0058	0.88015	5.97729	0.207222	0.0727	0.0012	0.1775	979	22	997	32	1001	33	1.83861
B18-9-2	Output_1_20	3	0.16	0.264	0.014	0.88238	3.78788	0.200872	0.0849	0.0022	0.16357	1403	44	1509	74	1306	51	7.55524
B18-9-2	Output_1_21	2.93	0.18	0.251	0.015	0.70913	3.98406	0.238092	0.0874	0.004	0.31685	1383	48	1439	79	1355	88	4.04917
B18-9-2	Output_1_22	2.58	0.2	0.225	0.011	0.91948	4.44444	0.217284	0.0835	0.0031	-0.5797	1286	57	1306	57	1270	74	1.55521
B18-9-2	Output_1_23	2.041	0.091	0.195	0.0087	0.77264	5.12821	0.228797	0.0765	0.0023	0.33733	1127	30	1147	47	1101	60	1.77462
B18-9-2	Output_1_24	2.022	0.072	0.1929	0.0074	0.73604	5.18403	0.198869	0.0765	0.002	0.39643	1121	24	1136	40	1102	53	1.33809
PB18-9-3	Output_1_1	1.8	0.12	0.166	0.0068	0.78908	6.0241	0.24677	0.0792	0.003	0.11509	1040	42	989	37	1165	75	4.90385
PB18-9-3	Output_1_2	1.77	0.31	0.151	0.013	0.40902	6.62252	0.57015	0.087	0.015	-0.1671	1000	110	905	71	1220	280	9.5
PB18-9-3	Output_1_3	1.588	0.075	0.1662	0.0072	0.89059	6.01685	0.260658	0.0723	0.002	-0.050449	963	31	990	40	987	58	2.80374
PB18-9-3	Output_1_4	1.844	0.087	0.1861	0.006	0.92416	5.37345	0.173244	0.0763	0.0014	-0.049274	1069	26	1100	33	1100	37	2.89991
PB18-9-3	Output_1_5	1.707	0.093	0.1831	0.0082	0.76378	5.4615	0.244589	0.0712	0.0025	0.16718	1008	35	1097	36	952	72	8.82937
PB18-9-3	Output_1_6	2.17	0.14	0.205	0.01	0.4043	4.87805	0.237954	0.0806	0.0041	0.81664	1167	46	1199	55	1190	100	2.74207
PB18-9-3	Output_1_7	2.91	0.14	0.251	0.013	0.94822	3.98406	0.206346	0.0874	0.0028	0.45857	1382	40	1442	68	1361	64	4.34153
PB18-9-3	Output_1_8	3.04	0.13	0.252	0.01	0.79413	3.96825	0.15747	0.0899	0.0028	0.51235	1415	33	1446	53	1415	60	2.19081
PB18-9-3	Output_1_9	1.513	0.076	0.1549	0.0084	0.72027	6.45578	0.350087	0.0737	0.0029	0.50185	933	31	927	47	1022	79	0.643087
PB18-9-3	Output_1_10	2.69	0.33	0.23	0.024	0.91879	4.34783	0.453686	0.0847	0.0041	-0.15481	1300	100	1330	130	1291	98	2.30769
PB18-9-3	Output_1_11	2.24	0.35	0.1855	0.0085	0.88986	5.39084	0.247019	0.086	0.011	0.0049055	1171	89	1096	46	1320	240	6.40478
PB18-9-3	Output_1_12	2.03	0.21	0.182	0.016	0.84236	5.49451	0.483034	0.0792	0.0033	0.075151	1114	69	1076	87	1194	98	3.41113
PB18-9-3	Output_1_13	2.99	0.18	0.245	0.013	0.69921	4.08163	0.216576	0.0883	0.0041	0.20703	1400	49	1408	67	1375	90	0.571429
PB18-9-3	Output_1_14	1.542	0.053	0.1608	0.0051	0.23525	6.21891	0.197241	0.0689	0.0028	0.56107	946	21	961	28	884	85	1.58562
PB18-9-3	Output_1_15	3.24	0.21	0.236	0.017	0.53631	4.23729	0.305228	0.0966	0.0058	0.59027	1477	42	1362	88	1580	130	7.78605
PB18-9-3	Output_1_16	3	0.15	0.244	0.012	0.70431	4.09836	0.201559	0.0876	0.0036	0.52689	1404	37	1404	64	1362	78	0
PB18-9-3	Output_1_17	3.04	0.13	0.2476	0.0085	0.87457	4.03877	0.138649	0.0862	0.0025	-0.30543	1415	34	1425	44	1336	58	0.706714
PB18-9-3	Output_1_18	1.92	0.24	0.183	0.019	0.96661	5.46448	0.56735	0.0739	0.002	-0.64629	1070	100	1080	110	1033	59	0.934579
PB18-9-3	Output_1_19	1.59	0.15	0.15	0.014	0.96929	6.66667	0.622222	0.0742	0.0018	-0.29326	953	69	900	79	1041	49	5.56139
PB18-9-3	Output_1_21	1.64	0.1	0.1616	0.0078	0.92193	6.18812	0.298684	0.0716	0.0022	-0.12385	983	40	965	44	968	61	1.83113
PB18-9-3	Output_1_22	2.59	0.32	0.207	0.026	0.98282	4.83092	0.606782	0.0872	0.0016	0.78864	1270	110	1210	150	1362	34	4.72441
PB18-9-3	Output_1_23	0.941	0.068	0.1017	0.0062	0.85431	9.83284	0.599446	0.0644	0.0019	-0.10872	670	36	624	36	772	75	6.86567
PB18-9-3	Output_1_24	1.526	0.058	0.1564	0.006	0.78374	6.39386	0.245289	0.0692	0.0022	0.30838	939	23	937	33	897	67	0.212993
PB18-9-3	Output_1_25	1.58	0.17	0.15	0.014	0.96749	6.66667	0.622222	0.0735	0.0031	-0.66614	948	80	900	78	1012	92	5.06329
PB18-9-3	Output_1_26	1.712	0.073	0.1721	0.0075	0.81276	5.81058	0.253221	0.0707	0.0018	0.33184	1011	27	1023	41	944	53	1.18694
PB18-9-3	Output_1_27	1.554	0.078	0.1571	0.0076	0.60903	6.36537	0.307937	0.0706	0.003	0.32467	950	32	940	43	932	87	1.05263
PB18-9-3	Output_1_28	2.08	0.12	0.1976	0.0061	0.88806	5.06073	0.156227	0.0762	0.0019	-0.1423	1154	30	1162	33	1095	49	0.693241
PB18-9-3	Output_1_29	2.56	0.15	0.212	0.01	0.66696	4.71698	0.222499	0.0864	0.0036	0.25772	1285	42	1238	55	1334	82	3.65759
PB18-9-3	Output_1_30	1.26	0.13	0.126	0.012	0.93052	7.93651	0.755858	0.0718	0.0024	-0.0020893	821	56	761	66	972	71	7.30816
PB18-9-3	Output_1_31	3.07	0.14	0.251	0.017	0.84602	3.98406	0.269837	0.0859	0.0032	0.20366	1421	35	1438	91	1327	69	1.19634
PB18-9-3	Output_1_33	1.92	0.31	0.171	0.023	0.98588	5.84795	0.786567	0.0782	0.0037	-0.85816	1050	130	1010	130	1136	99	3.80952
PB18-9-3	Output_1_34	1.697	0.07	0.1688	0.0063	0.85313	5.92417	0.221104	0.0717	0.0026	0.58432	1006	26	1005	35	965	78	0.0994036
PB18-9-3	Output_1_35	1.73	0.17	0.161	0.017	0.91196	6.21118	0.655839	0.0759	0.0027	0.53514	1007	68	959	93	1082	72	4.76663
PB18-9-3	Output_1_36	2.08	0.12	0.197	0.013	0.98179	5.07614	0.334974	0.076	0.0017	0.6227	1139	37	1157	69	1091	45	1.58033
PB18-9-3	Output_1_37	2.9	0.1	0.2254	0.0086	0.59377	4.43656	0.169274	0.0929	0.003	0.50551	1379	26	1310	45	1478	61	5.00363
PB18-9-3	Output_1_38	3.69	0.17	0.2803	0.0092	0.51529	3.56761	0.117096	0.0952	0.0037	0.22612	1567	36	1592	46	1521	73	1.59541
PB18-9-3	Output_1_39	2.25	0.13	0.195	0.014	0.82253	5.12821	0.368179	0.0841	0.0036	0.62804	1191	42	1146	77	1283	83	3.77834
PB18-9-1	Output_1_1	2.43	0.25	0.212	0.012	0.16356	4.71698	0.266999	0.0907	0.0053	0.39239	1235	83	1240	63	1420	110	0.404858
PB18-9-1	Output_1_2	1.611	0.062	0.173	0.012	0.32739	5.78035	0.400949	0.0742	0.0045	0.6115	973	25	1029	67	1020	120	5.7554
PB18-9-1	Output_1_3	3.09	0.19	0.261	0.017	0.28774	3.83142	0.249556	0.092	0.0036	0.76392	1425	48	1490	86	1456	74	4.5614
PB18-9-1	Output_1_4	1.91	0.18	0.207	0.016	0.35655	4.83092	0.373404	0.0736	0.004	0.35121	1072	67	1209	87	1010	110	12.7799
PB18-9-1	Output_1_5	1.63	0.15	0.1683	0.0094	-0.077442	5.94177	0.331864	0.0763	0.0034	0.49086	993	49	1002	52	1087	91	0.906344
PB18-9-1	Output_1_6	1.99	0.11	0.1908	0.0083	-0.20711	5.24109	0.227993	0.0775	0.0017	0.38577	1108	37	1125	45	1131	43	1.5343
PB18-9-1	Output_1_7	1.47	0.16	0.161	0.018	0.66419	6.21118	0.694418	0.0721	0.0021	-0.52108	904	67	950	100	981	59	5.0885
PB18-9-1	Output_1_8	2.44	0.28	0.2189	0.008	0.82709	4.5683	0.166955	0.0839	0.0025	-0.42856	1267	71	1276	42	1284	61	0.710339
PB18-9-1	Output_1_9	1.97	0.21	0.189	0.012	0.71404	5.29101	0.335937	0.0786	0.0032	-0.12514	1113	62	1113	64	1148	83	0
PB18-9-1	Output_1_10	2.81	0.25	0.252	0.011	0.98936	3.96825	0.173217	0.0849	0.0027	0.58959	1345	74	1450	56	1304	65	7.80669
PB18-9-1	Output_1_11	2.05	0.19	0.209	0.014	0.2018	4.78469	0.320505	0.0755	0.0036	0.64586	1147	50	1219	72	1065	99	6.27724
PB18-9-1	Output_1_12	1.53	0.15	0.1652	0.0084	0.47334	6.05327	0.307793	0.0703	0.0024	0.0049151	953	50	984	46	927	72	3.25289
PB18-9-1	Output_1_13	1.75	0.18	0.186	0.015	0.58435	5.37634	0.433576	0.0695	0.0019	0.45857	1013	70	1096	81	906	56	8.19348
PB18-9-1	Output_1_14	1.723	0.086	0.1668	0.0067	0.35736	5.9952	0.240814	0.0726	0.0019	0.2609	1015	32	994	37	997	51	2.06897
PB18-9-1	Output_1_15	2.45	0.15	0.221	0.012	0.52621	4.52489	0.245695	0.0813	0.0028	0.61214	1253	46	1285	66	1220	67	2.55387
PB18-9-1	Output_1_16	1.96	0.22	0.197	0.018	0.76875	5.07614	0.46381	0.0744	0.003	0.75221	1110	61	1157	96	1040	80	4.23423
PB18-9-1	Output_1_17	6.3	0.55	0.383	0.024	0.32565	2.61097	0.163611	0.124	0.0025	0.30489	2001	81	2090	110	2012	35	4.44778
PB18-9-1	Output_1_18	2.38	0.23	0.188	0.013	0.94009	5.31915	0.367814	0.0855	0.0016	0.43971	1225	66	1107	70	1325	35	9.63265
PB18-9-1	Output_1_19	2.94	0.14	0.2353	0.0076	0.51315	4.24989	0.137268	0.086	0.0014	0.62319	1387	37	1361	40	1335	32	1.87455
PB18-9-1	Output_1_20	1.614	0.091	0.1576	0.0038	0.65265	6.34518	0.152993	0.0708	0.00064	0.51141	972	36	943	21	950	19	2.98354
PB18-9-1	Output_1_21	2.13	0.17	0.1952	0.0071	0.57017	5.12295	0.186337	0.0781	0.0023	0.064088	1170	49	1149	38	1143	55	1.79487
PB18-9-1	Output_1_22	2.16	0.17	0.193	0.0044	-0.13392	5.18135	0.118124	0.0809	0.0037	0.52713	1162	52	1138	24	1203	88	2.0654
PB18-9-1	Output_1_23	1.9	0.12	0.1876	0.0047	0.51345	5.33049	0.133546	0.0736	0.0021	0.055769	1077	43	1108	25	1023	59	2.87837
PB18-9-1	Output_1_24	2.93	0.24	0.2358	0.008	0.85659	4.24088	0.143881	0.0873	0.0012	0.56645	1378	63	1364	42	1364	27	1.01597
PB18-9-1	Output_1_25	2.65	0.17	0.2262	0.0054	0.6459	4.42087	0.105538	0.0831	0.0013	0.5919	1324	40	1314	29	1268	31	0.755287
PB18-9-1	Output_1_26	2.89	0.14	0.2143	0.0075	0.91786	4.66636	0.163312	0.0946	0.0027	0.80813	1375	38	1251	40	1515	53	9.01818
PB18-9-1	Output_1_27	2.1	0.2	0.1994	0.0086	0.91918	5.01504	0.216296	0.0745	0.0012	0.62571	1135	67	1171	46	1052	34	3.17181
PB18-9-1	Output_1_28	2.13	0.14	0.2083	0.008	0.82705	4.80077	0.184379	0.0747	0.0019	0.57552	1154	47	1233	34	1054	51	6.84575
PB18-9-1	Output_1_29	1.2	0.24	0.131	0.017	0.98539	7.63359	0.990618	0.0637	0.003	-0.86535	760	120	787	96	710	100	3.55263
PB18-9-1	Output_1_30	2.09	0.19	0.199	0.01	0.88233	5.02513	0.252519	0.0785	0.0022	0.068738	1191	69	1168	56	1154	56	1.93115
PB18-9-1	Output_1_31	1.65	0.17	0.172	0.012	0.67634	5.81395	0.405625	0.0712	0.0024	0.5723	1001	55	1021	65	952	72	1.998
PB18-9-1	Output_1_32	1.11	0.12	0.1314	0.0073	0.65887	7.61035	0.422797	0.0639	0.0036	0.13611	750	58	795	41	710	120	6
PB18-9-1	Output_1_33	2.08	0.23	0.203	0.013	0.7508	4.92611	0.315465	0.0761	0.002	0.050095	1156	63	1187	70	1092	54	2.68166
PB18-9-1	Output_1_34	2.04	0.18	0.193	0.014	0.77072	5.18135	0.375849	0.076	0.0022	0.38693	1118	62	1136	74	1087	58	1.61002
PB18-9-1	Output_1_35	2.8	0.49	0.236	0.031	0.89161	4.23729	0.556593	0.0853	0.0049	0.43283	1290	160	1350	170	1300	110	4.65116
PB18-9-1	Output_1_36	1.65	0.28	0.163	0.018	0.94937	6.13497	0.677481	0.0714	0.0031	-0.68821	950	130	970	100	952	94	2.10526
PB18-9-1	Output_1_37	3.25	0.39	0.276	0.018	0.74118	3.62319	0.236295	0.0866	0.004	-0.14925	1480	83	1566	88	1336	90	5.81081
PB18-9-1	Output_1_38	2.44	0.24	0.224	0.014	0.5471	4.46429	0.279018	0.083	0.0043	0.38599	1267	58	1301	72	1250	100	2.6835
PB18-9-1	Output_1_39	2.33	0.19	0.203	0.011	0.67103	4.92611	0.266932	0.0825	0.0029	0.51061	1214	59	1190	58	1275	87	1.97694
PB18-9-1	Output_1_40	1.82	0.16	0.19	0.013	0.088301	5.26316	0.360111	0.073	0.0027	0.57056	1065	43	1117	69	1035	94	4.88263
PB18-9-1	Output_1_41	2.2	0.33	0.212	0.014	0.7	4.71698	0.311499	0.0747	0.0039	0.33177	1155	99	1235	71	1070	130	6.92641
PB18-9-1	Output_1_42	2.33	0.27	0.217	0.022	0.77218	4.6083	0.4672	0.079	0.0044	0.038338	1203	79	1260	120	1150	110	4.73815
PB18-9-1	Output_1_43	2.01	0.14	0.2025	0.0085	0.61975	4.93827	0.207286	0.0728	0.0018	0.44836	1114	47	1188	46	1004	50	6.64273

## Sheet: FL-3
Zircon number	Final238_206	238_206_error	Final207_206	207_206_error	FinalAge206_238	206_238_error	FinalAge207_206	207_206_error	2.83715
FL3_1	4.17076	0.016065	0.0864046	0.010848	1385.47	19.9973	1347.25	20.7996	2.18483
FL3_2	3.8986	0.0230131	0.0907066	0.0148776	1471.92	30.2136	1440.45	28.0933	3.92325
FL3_4	4.90184	0.0148467	0.0781866	0.00802491	1196.8	16.1963	1151.62	15.8499	2.78935
FL3_5	4.92516	0.0156574	0.0811805	0.00812785	1191.62	17.0123	1225.82	15.8806	1.47297
FL3_6	3.98489	0.0164023	0.0918816	0.00881805	1443.36	21.1765	1464.94	16.6588	1.82765
FL3_7	5.64428	0.014359	0.0750961	0.00849171	1051.5	13.9164	1071.07	16.9675	0.494129
FL3_8	4.68426	0.0159381	0.0823364	0.0097452	1247.34	18.0498	1253.53	18.946	2.54797
FL3_9	4.0741	0.017712	0.0912574	0.0113414	1414.98	22.4631	1451.98	21.4296	0.918574
FL3_10	4.96416	0.015826	0.0790067	0.00838013	1183.07	17.083	1172.3	16.4979	6.82015
FL3_11	4.10697	0.0169095	0.0939758	0.00805671	1404.81	21.3092	1507.63	15.141	0.612373
FL3_12	3.8177	0.0154961	0.0931344	0.00942225	1499.75	20.7015	1490.62	17.7324	1.46012
FL3_13	3.84245	0.0165756	0.0921105	0.00843648	1491.12	22.0282	1469.67	15.9316	5.46592
FL3_14	5.24535	0.0149973	0.0797135	0.0103231	1124.87	15.4615	1189.91	20.2461	4.34649
FL3_15	5.48148	0.0148285	0.0773154	0.0087994	1080.25	14.7315	1129.34	17.4278	2.18367
FL3_16	5.03565	0.0131415	0.0778386	0.00696598	1167.71	14.0206	1142.76	13.7856	1.65406
FL3_17	5.54258	0.0161881	0.0757042	0.00836394	1069.28	15.9304	1087.26	16.6734	1.04154
FL3_18	6.10812	0.0155967	0.0713453	0.00912182	977.397	14.1293	967.322	18.5071	4.93398
FL3_19	5.2929	0.0153912	0.0790541	0.00769349	1115.59	15.7474	1173.49	15.1502	0.931995
FL3_20	4.05457	0.0136846	0.0904225	0.00772624	1421.1	17.4292	1434.47	14.6664	0.00626632
FL3_21	4.01791	0.0143666	0.0903441	0.00746766	1432.72	18.4301	1432.81	14.181	2.66919
FL3_22	5.48787	0.0146987	0.0765191	0.00693792	1079.09	14.5882	1108.69	13.7994	0.0580368
FL3_24	5.06147	0.0130724	0.0785803	0.00849185	1162.26	13.8876	1161.58	16.7428	2.15151
FL3_25	5.59594	0.0136292	0.0738566	0.00944752	1059.87	13.3065	1037.55	18.9607	1.72352
FL3_26	5.44769	0.0137192	0.0749816	0.00750589	1086.42	13.7019	1068.01	15.0141	0.738857
FL3_27	5.59724	0.016637	0.0749639	0.0124353	1059.65	16.2362	1067.53	24.7974	1.88533
FL3_28	4.8325	0.0141323	0.0797179	0.010051	1212.45	15.601	1190.02	19.7156	2.20347
FL3_31	6.01029	0.0167524	0.0730196	0.00917537	992.143	15.3866	1014.5	18.4819	30.4895
FL3_32	8.65946	0.0192919	0.0729842	0.0112398	704.499	12.862	1013.51	22.6135	11.5425
FL3_33	6.42605	0.0187978	0.0744626	0.0102707	932.371	16.2974	1054.03	20.551	5.29267
FL3_34	5.01858	0.0167968	0.0816361	0.012659	1171.34	17.9658	1236.8	24.6241	2.17239
FL3_35	5.21314	0.0158865	0.0764619	0.0100392	1131.24	16.4619	1107.19	19.9325	6.81425
FL3_36	5.31408	0.0161631	0.0798297	0.00911189	1111.5	16.4808	1192.78	17.877	10.1457
FL3_37	4.52785	0.013292	0.0902887	0.00701574	1286.39	15.4821	1431.64	13.3287	1.92166
FL3_38	5.62238	0.0131892	0.0752787	0.00638817	1055.28	12.826	1075.95	12.7724	11.0598
FL3_39	4.73812	0.0141832	0.0882502	0.0122549	1234.43	15.9143	1387.94	23.3449	7.4983
FL3_40	5.41197	0.0156768	0.0793794	0.0104129	1093.01	15.7418	1181.61	20.4456	4.2695
FL3_41	4.54564	0.0133786	0.0860362	0.0083249	1281.83	15.5329	1339	16.0056	4.52371
FL3_42	5.24093	0.0136125	0.0792777	0.00924649	1125.74	14.0453	1179.08	18.1755	9.24722
FL3_43	5.53421	0.0135357	0.0793096	0.00749183	1070.77	13.3401	1179.87	14.7413	3.9402
FL3_44	5.33236	0.0175887	0.0782588	0.0111827	1108	17.8807	1153.45	22.0363	9.96471
FL3_45	4.48443	0.0174324	0.0907468	0.0109196	1297.67	20.4576	1441.3	20.6679	2.7479
FL3_46	5.97152	0.0144702	0.0714886	0.00877347	998.11	13.3665	971.416	17.7932	2.62268
FL3_47	5.12167	0.0165635	0.0793433	0.0104422	1149.75	17.4186	1180.71	20.5054	2.99296
FL3_48	4.28444	0.015325	0.0848893	0.0115264	1352.31	18.6678	1313.01	22.1966	2.55715
FL3_49	5.5114	0.0182396	0.0742418	0.0126635	1074.85	18.0323	1048.05	25.3225	1.75383
FL3_50	4.35485	0.0156961	0.0847396	0.011133	1332.56	18.868	1309.59	21.4545	8.66934
FL3_51	4.4083	0.0168183	0.0908301	0.00974236	1317.94	20.0154	1443.04	18.4488	14.2799
FL3_53	6.29509	0.0216807	0.0765209	0.0136447	950.404	19.1301	1108.73	27.0224	6.32388
FL3_54	4.34677	0.0212904	0.0899704	0.0151324	1334.79	25.6181	1424.9	28.6302	6.03919
FL3_55	5.98984	0.0175858	0.0746559	0.0125573	995.281	16.1982	1059.25	25.0698	2.55396
FL3_56	5.64647	0.0171411	0.0733974	0.014242	1051.12	16.6038	1024.94	28.5489	0.845486
FL3_57	4.66576	0.0156421	0.0818252	0.0107772	1251.83	17.7728	1241.34	20.9751	1.15255
FL3_58	4.65048	0.0143285	0.0818222	0.00736688	1255.57	16.3261	1241.26	14.369	0.68182
FL3_59	3.74002	0.0136324	0.0944504	0.00869289	1527.48	18.5134	1517.14	16.3095	0.480766
FL3_60	5.81192	0.014928	0.0735227	0.0110007	1023.45	14.1116	1028.4	22.0861	3.15913
FL3_61	5.05762	0.0163777	0.0801633	0.00966568	1163.07	17.4054	1201.01	18.9343	2.94131
FL3_62	4.85011	0.0170934	0.0790709	0.0118333	1208.44	18.8083	1173.91	23.2395	3.62997
FL3_63	6.05431	0.0156407	0.0733113	0.0136666	985.452	14.277	1022.57	27.4154	3.18724
FL3_64	4.10297	0.0133679	0.091274	0.00813854	1406.04	16.8651	1452.33	15.4078	24.6912
FL3_65	6.37449	0.0165923	0.0820782	0.0102325	939.389	14.4879	1247.38	19.9046	7.78302
FL3_66	5.51785	0.014509	0.0786885	0.00882455	1073.69	14.334	1164.31	17.3881	1.99028
FL3_67	4.15895	0.0181077	0.0896094	0.00897716	1389.01	22.587	1417.22	17.0677	1.60881
FL3_68	4.85826	0.0200548	0.0812012	0.00909635	1206.59	22.0306	1226.32	17.7607	11.9733
FL3_69	7.2226	0.0257698	0.0707298	0.015172	835.916	20.1716	949.616	30.7447	0.11263
FL3_70	5.90074	0.0212101	0.0728696	0.0107912	1009.19	19.7833	1010.33	21.7276	3.71067
FL3_72	4.7843	0.0197595	0.0793067	0.0111436	1223.58	21.9838	1179.8	21.8758	4.49517
FL3_74	4.6417	0.0201806	0.0850607	0.00820374	1257.72	23.0179	1316.92	15.8225	2.66396
FL3_75	4.99207	0.0200574	0.0779848	0.00881095	1177.03	21.5422	1146.48	17.4067	4.69739
FL3_76	5.25364	0.0215326	0.0792587	0.0113628	1123.24	22.1583	1178.6	22.3069	13.679
FL3_77	6.59643	0.0232034	0.0744651	0.0118691	909.91	19.6606	1054.1	23.7245	15.2926
FL3_78	5.29338	0.0193903	0.0850589	0.00974727	1115.5	19.8313	1316.88	18.7813	4.93666
FL3_79	6.10703	0.0204049	0.0735201	0.00987866	977.559	18.4817	1028.32	19.848	4.28013
FL3_80	5.44309	0.0206875	0.0775698	0.00853458	1087.26	20.665	1135.88	16.89	0.662287
FL3_81	6.28394	0.0212459	0.070595	0.00870044	951.972	18.7756	945.709	17.7157	0.339732
FL3_82	5.59929	0.0227078	0.0747914	0.0164154	1059.29	22.1437	1062.9	32.6733	2.08079
FL3_83	4.89339	0.0179431	0.081112	0.00795193	1198.69	19.597	1224.16	15.5423	6.46296
FL3_84	4.3128	0.0222184	0.0905504	0.00833206	1344.28	26.903	1437.16	15.8047	2.94766
FL3_86	5.19015	0.0207812	0.0789282	0.00794169	1135.84	21.6052	1170.33	15.6436	3.93324
FL3_87	4.75028	0.0190535	0.083545	0.00877271	1231.56	21.3249	1281.98	16.9971	7.81984
FL3_89	5.5304	0.0241832	0.0786103	0.0217337	1071.45	23.8281	1162.34	42.4871	2.24329
FL3_90	4.39747	0.0179656	0.086581	0.0084979	1320.88	21.4214	1351.19	16.3087	0.375135
FL3_91	5.88661	0.0180579	0.0727736	0.00725231	1011.43	16.8815	1007.65	14.6417	17.3252
FL3_92	6.80324	0.0175118	0.0750307	0.00707552	884.062	14.4507	1069.32	14.1544	0.647767
FL3_93	5.75858	0.0180518	0.07342	0.0080376	1032.21	17.195	1025.57	16.1749	1.70449
FL3_94	4.71563	0.0186038	0.0826636	0.00859701	1239.79	20.9484	1261.29	16.7075	0.806976
FL3_95	5.08992	0.0182995	0.0787444	0.00899563	1156.31	19.3416	1165.72	17.7196	3.35328
FL3_96	4.14936	0.0180904	0.0906944	0.0072884	1391.9	22.6074	1440.19	13.8283	0.958035
FL3_97	3.93694	0.0177131	0.0909353	0.00788641	1459.09	23.0875	1445.25	14.9471	0.344133
FL3_98	5.21325	0.0182937	0.0775406	0.0100524	1131.22	18.9523	1135.13	19.8766	6.67516
FL3_99	5.94042	0.018473	0.0752312	0.00849025	1002.95	17.1353	1074.69	16.9555	0.139451
FL3_100	4.28171	0.0179031	0.0865817	0.00704128	1353.09	21.814	1351.2	13.5256	4.09309
FL3_102	4.46773	0.0191634	0.0868711	0.0116176	1302.07	22.554	1357.64	22.2325	2.45146
FL3_103	5.99756	0.0176392	0.0731848	0.00737248	994.093	16.2295	1019.08	14.8574	3.28913
FL3_104	4.12873	0.0173708	0.090957	0.00732862	1398.15	21.7969	1445.7	13.8939	2.94516
FL3_105	5.3607	0.0191196	0.0775777	0.0113183	1102.62	19.3482	1136.08	22.3584	0.0102494
FL3_106	5.12539	0.017719	0.0780782	0.00868546	1148.98	18.6207	1148.86	17.1542	2.10584
FL3_107	5.11978	0.0207624	0.0791095	0.0131641	1150.14	21.8336	1174.88	25.8276	1.02528
FL3_108	5.04585	0.0188717	0.0792195	0.0115596	1165.55	20.0907	1177.62	22.6937	4.96593
FL3_109	4.64454	0.020673	0.0853152	0.00770545	1257.03	23.5668	1322.71	14.8541	7.01134
FL3_110	4.9328	0.0189123	0.0834457	0.00857726	1189.94	20.5168	1279.66	16.6259	4.46997
FL3_111	4.18364	0.0185484	0.0909847	0.00860812	1381.63	23.0258	1446.28	16.3053	13.9546
FL3_112	6.79724	0.0183154	0.0735186	0.0131253	884.79	15.1246	1028.28	26.3159	2.71143
FL3_113	5.22818	0.0184898	0.0785058	0.0084324	1128.26	19.1093	1159.7	16.6307	6.44812
FL3_114	6.65777	0.0248206	0.0712385	0.0155906	902.087	20.8605	964.264	31.5136	24.1612
FL3_115	7.53432	0.0250713	0.0746595	0.0144751	803.397	18.9099	1059.35	28.8624	1.18286
FL3_116	5.16601	0.0196863	0.0782945	0.0096496	1140.7	20.5487	1154.36	19.0314	3.53411
FL3_117	6.10428	0.0198451	0.0705563	0.0123337	977.968	17.9824	944.585	25.0586	3.4858
FL3_118	6.42392	0.0231671	0.071311	0.0251253	932.658	20.0853	966.343	50.4597	3.44523
FL3_119	4.52584	0.018371	0.0857623	0.00719743	1286.91	21.3959	1332.83	13.8596	4.97748
FL3_120	5.66313	0.0195818	0.0763086	0.0111845	1048.27	18.9171	1103.18	22.2032	3.47712
FL3_121	4.45588	0.0189444	0.0866274	0.010761	1305.2	22.3451	1352.22	20.6197	4.04935
FL3_123	5.97581	0.0185861	0.0739294	0.0125688	997.445	17.1527	1039.54	25.1666	0.52364
FL3_124	5.80402	0.0191894	0.0731966	0.0102077	1024.74	18.1553	1019.4	20.5323	5.20056
FL3_126	4.53628	0.0193118	0.0867379	0.0085208	1284.23	22.4475	1354.68	16.3445	0.799035
FL3_127	5.65593	0.0187554	0.0739895	0.00741104	1049.5	18.1395	1041.18	14.8851	0.650564
FL3_128	4.54333	0.0236635	0.0832092	0.018014	1282.42	27.46	1274.13	34.7381	24.0833
FL3_129	7.73012	0.0181417	0.0736912	0.0078284	784.237	13.3822	1033.02	15.7384	8.93382
FL3_130	4.62071	0.0192993	0.0881985	0.00883884	1262.92	22.0965	1386.81	16.8762	1.54227
FL3_131	5.35818	0.0192166	0.0769686	0.00994115	1103.1	19.4539	1120.38	19.7007	3.14316
FL3_132	5.24671	0.0179445	0.078561	0.00827822	1124.6	18.4917	1161.1	16.325	3.00937
FL3_133	4.48984	0.0174154	0.0859242	0.00916519	1296.26	20.4176	1336.48	17.618	1.08037
FL3_134	6.00278	0.017821	0.0726477	0.0074562	993.293	16.3843	1004.14	15.0594	4.44587
FL3_135	4.97603	0.0191481	0.0815786	0.00921865	1180.49	20.6222	1235.42	17.9747	2.57251
FL3_136	6.3097	0.0201121	0.0715581	0.0134698	948.359	17.7125	973.4	27.2263	2.63082
FL3_137	4.04216	0.0191775	0.0918128	0.00948381	1425.01	24.4719	1463.52	17.9126	3.23306
FL3_138	4.4121	0.0220511	0.0870189	0.0146333	1316.91	26.212	1360.91	27.938	0.0707297
FL3_139	5.06016	0.0181591	0.0786507	0.00810743	1162.53	19.2876	1163.36	15.9846	1.25092
FL3_140	5.21444	0.0192814	0.0779387	0.0111209	1130.98	19.9701	1145.31	21.9415	9.27254
FL3_141	6.21542	0.0178524	0.0746841	0.00808429	961.722	15.93	1060.01	16.1844	3.12615
FL3_142	5.09292	0.017734	0.0798378	0.00857325	1155.69	18.7357	1192.98	16.8255	2.00449
FL3_143	4.48941	0.0183015	0.0853229	0.00911816	1296.37	21.4564	1322.89	17.5613	2.01118
FL3_144	4.40441	0.0184357	0.0840188	0.00789831	1318.99	21.9528	1292.99	15.2877	4.79277
FL3_145	6.21853	0.0193629	0.0728458	0.00990187	961.276	17.2687	1009.67	19.9505	4.70515
FL3_147	3.6623	0.0201383	0.100487	0.00778842	1556.28	27.7846	1633.12	14.401	3.38794
FL3_148	4.80455	0.0187625	0.0826779	0.00809239	1218.88	20.8037	1261.62	15.7311	13.1523
FL3_149	6.83893	0.0197905	0.0729649	0.0092465	879.749	16.2543	1012.98	18.6286	1.11531
FL3_150	5.85452	0.0194817	0.072691	0.0125407	1016.56	18.2958	1005.35	25.2406	7.36089
FL3_151	6.35775	0.0205367	0.0730924	0.0107955	941.69	17.968	1016.51	21.7159	3.63135
FL3_152	6.11591	0.0189657	0.0729667	0.00925675	976.243	17.1585	1013.03	18.649	3.02483
FL3_153	5.42381	0.0190053	0.0771411	0.00983075	1090.82	19.044	1124.84	19.4705	11.3972
FL3_154	4.60846	0.0190575	0.0901546	0.00782579	1265.96	21.8677	1428.81	14.8659	12.9924
FL3_155	7.43495	0.019647	0.0702257	0.0132432	813.486	14.9977	934.96	26.9305	5.02914
FL3_156	4.11782	0.0180215	0.0924037	0.00752602	1401.48	22.66	1475.7	14.2088	1.52911
FL3_157	10.7184	0.0187559	0.0589798	0.011396	575.01	10.3096	566.35	24.6219	1.08381
FL3_158	5.15571	0.0210352	0.0783322	0.0117038	1142.79	21.991	1155.31	23.0493	3.8542
FL3_159	5.53006	0.0186903	0.0736445	0.0105341	1071.51	18.4245	1031.74	21.145	2.11733
FL3_160	5.68837	0.0188528	0.0749274	0.0106615	1043.97	18.1452	1066.56	21.2876	3.62746
FL3_161	6.15985	0.0201027	0.0727243	0.0115895	969.777	18.0742	1006.28	23.3373	#DIV/0!

## Sheet: NY14-TAP-22
Zircon number	Final238_206	238_206_error	Final207_206	207_206_error	FinalAge206_238	206_238_error	FinalAge207_206	207_206_error	4.50947
NY14TAP-22_1	5.84817	0.0176542	0.0715678	0.0149246	1017.58	16.5971	973.676	30.1373	0.0310454
NY14TAP-22_2	1.90422	0.0153787	0.187668	0.00786438	2720.99	34.0456	2721.83	12.9	0.997578
NY14TAP-22_3	4.89776	0.015391	0.0795511	0.00978128	1197.71	16.8009	1185.88	19.2013	2.19748
NY14TAP-22_4	3.911	0.0160952	0.0936332	0.0101343	1467.75	21.0929	1500.73	19.0384	2.81885
NY14TAP-22_5	3.90668	0.0190164	0.0901599	0.0140757	1469.2	24.9356	1428.92	26.6339	5.96086
NY14TAP-22_6	4.54559	0.0171327	0.0871174	0.0143962	1281.84	19.885	1363.09	27.4811	4.60642
NY14TAP-22_8	4.4262	0.0158483	0.0877278	0.0090435	1313.12	18.8006	1376.53	17.2892	0.859202
NY14TAP-22_9	5.12737	0.0154718	0.0784594	0.00865819	1148.58	16.2569	1158.53	17.0765	5.42347
NY14TAP-22_10	4.85555	0.016923	0.0833075	0.017261	1207.2	18.6038	1276.43	33.2908	2.35233
NY14TAP-22_11	4.99407	0.0181706	0.0781054	0.0113251	1176.6	19.5123	1149.56	22.3277	2.49648
NY14TAP-22_12	2.11027	0.0160556	0.170702	0.00891346	2500.52	33.1915	2564.54	14.832	1.1012
NY14TAP-22_13	5.08521	0.0163091	0.0789219	0.00843304	1157.29	17.254	1170.18	16.6067	2.52224
NY14TAP-22_14	5.45885	0.0168659	0.0766627	0.0135347	1084.37	16.8115	1112.43	26.7918	3.02618
NY14TAP-22_15	5.97297	0.0165337	0.0735456	0.0107263	997.885	15.2671	1029.03	21.5369	13.5105
NY14TAP-22_16	2.68878	0.0151442	0.15096	0.00834618	2038.41	26.4115	2356.83	14.1858	3.14172
NY14TAP-22_17	3.94083	0.0151361	0.0938497	0.00871572	1457.81	19.7182	1505.09	16.3783	6.76187
NY14TAP-22_19	2.17062	0.0159531	0.17645	0.00809363	2442.64	32.3541	2619.78	13.4025	6.35549
NY14TAP-22_20	4.3608	0.0149761	0.089798	0.00857921	1330.91	17.9838	1421.24	16.3062	5.09327
NY14TAP-22_21	2.12692	0.0163892	0.176219	0.00859466	2484.28	33.6996	2617.6	14.231	0.717229
NY14TAP-22_22	4.06203	0.0148496	0.0892092	0.00845769	1418.76	18.8831	1408.65	16.1041	3.50632
NY14TAP-22_23	5.54869	0.0172734	0.0736541	0.0140234	1068.19	16.9812	1032.01	28.0848	2.3701
NY14TAP-22_24	3.84392	0.0157811	0.0914555	0.0119647	1490.62	20.9677	1456.1	22.586	2.83214
NY14TAP-22_25	4.14969	0.0159389	0.0903229	0.0122435	1391.8	19.9216	1432.37	23.1825	1.98566
NY14TAP-22_27	3.81158	0.017692	0.0922558	0.0143083	1501.9	23.6598	1472.66	26.911	0.0451457
NY14TAP-22_28	5.89594	0.0169553	0.0728397	0.015703	1009.95	15.8305	1009.5	31.5212	0.577218
NY14TAP-22_29	5.61392	0.0188881	0.0743388	0.0125451	1056.74	18.3835	1050.68	25.0776	3.15943
NY14TAP-22_30	3.69613	0.0165867	0.093416	0.0117662	1543.61	22.7286	1496.33	22.0946	7.47795
NY14TAP-22_31	4.19748	0.0157282	0.0930482	0.0103126	1377.53	19.4782	1488.87	19.4019	1.72147
NY14TAP-22_33	4.77897	0.0163792	0.0820318	0.0103855	1224.82	18.2451	1246.28	20.2035	0.0765041
NY14TAP-22_34	4.01021	0.0156823	0.090509	0.00936446	1435.19	20.1462	1436.29	17.7536	3.56269
NY14TAP-22_35	4.8848	0.0169928	0.0784901	0.0133174	1200.61	18.5877	1159.31	26.1849	2.01929
NY14TAP-22_36	5.0817	0.0152828	0.0775396	0.00813581	1158.02	16.179	1135.1	16.1067	2.78647
NY14TAP-22_37	4.94904	0.0150787	0.0782889	0.00957192	1186.37	16.3187	1154.21	18.8795	5.23422
NY14TAP-22_38	2.98991	0.0175604	0.108088	0.010437	1859.96	28.3098	1767.44	18.9436	5.85808
NY14TAP-22_39	5.63505	0.0153884	0.0769007	0.0115573	1053.09	14.9335	1118.62	22.8858	0.214934
NY14TAP-22_40	4.09978	0.0146507	0.0892743	0.00804949	1407.02	18.4927	1410.05	15.3278	1.22588
NY14TAP-22_41	3.99875	0.0152827	0.0914859	0.0094229	1438.88	19.6785	1456.74	17.8145	3.40788
NY14TAP-22_42	3.8451	0.0154901	0.0907374	0.00869935	1490.21	20.5768	1441.1	16.4888	0.217492
NY14TAP-22_43	4.67288	0.0147602	0.0820782	0.00779003	1250.1	16.7511	1247.38	15.177	4.19853
NY14TAP-22_44	3.81084	0.0161744	0.0907627	0.0093782	1502.16	21.6369	1441.63	17.7667	0.0432203
NY14TAP-22_45	5.60543	0.0168239	0.0746006	0.00856042	1058.22	16.398	1057.76	17.1381	0.646234
NY14TAP-22_46	5.80646	0.0195287	0.0731375	0.0165038	1024.34	18.4692	1017.76	33.0704	7.93013
NY14TAP-22_47	5.10152	0.0152112	0.0823264	0.00751983	1153.9	16.051	1253.29	14.6407	0.512607
NY14TAP-22_49	4.47465	0.0147422	0.0840457	0.00915551	1300.24	17.3356	1293.61	17.7054	2.1811
NY14TAP-22_50	4.93846	0.0160673	0.0786493	0.00944314	1188.7	17.4181	1163.32	18.6023	2.9281
NY14TAP-22_51	5.77254	0.0162162	0.0747197	0.00897422	1029.91	15.4169	1060.97	17.9531	5.54632
NY14TAP-22_52	4.8366	0.01532	0.0780384	0.00825248	1211.52	16.8984	1147.85	16.306	2.98204
NY14TAP-22_53	5.82236	0.0164262	0.0744304	0.0131424	1021.76	15.5023	1053.16	26.2519	0.962047
NY14TAP-22_54	5.96291	0.0158475	0.0728274	0.0112807	999.445	14.6552	1009.15	22.7101	0.821607
NY14TAP-22_55	4.85547	0.0170874	0.0800161	0.0124472	1207.22	18.7846	1197.39	24.3527	1.22861
NY14TAP-22_56	5.70995	0.0175869	0.0734975	0.0144405	1040.33	16.8741	1027.7	28.931	1.92477
NY14TAP-22_57	3.93494	0.0157735	0.0903146	0.01062	1459.76	20.5717	1432.19	20.1295	0.877229
NY14TAP-22_61	5.50307	0.014467	0.0756518	0.00798562	1076.35	14.325	1085.87	15.9264	0.414672
NY14TAP-22_63	5.55655	0.0148899	0.0751023	0.00882366	1066.8	14.6232	1071.24	17.6266	1.86575
NY14TAP-22_65	5.45495	0.0157917	0.0748774	0.012533	1085.09	15.7515	1065.21	24.9993	9.32772
NY14TAP-22_66	5.29635	0.015913	0.0813377	0.0138748	1114.92	16.2717	1229.62	26.9959	7.60486
NY14TAP-22_69	4.70038	0.0155178	0.0863393	0.00984994	1243.44	17.5248	1345.79	18.9016	2.3548
NY14TAP-22_70	4.70514	0.0151978	0.0831296	0.00975651	1242.3	17.1497	1272.26	18.9175	0.752285
NY14TAP-22_71	5.92896	0.0146962	0.0724013	0.0124723	1004.74	13.6582	997.242	25.1349	3.84612
NY14TAP-22_72	4.90827	0.0180254	0.0819024	0.0150112	1195.37	19.6373	1243.18	29.1296	9.01682
NY14TAP-22_73	4.83254	0.0163781	0.0766524	0.0116414	1212.44	18.0765	1112.16	23.0729	0.209388
NY14TAP-22_74	5.62043	0.0151023	0.0746031	0.00816494	1055.61	14.6886	1057.83	16.3504	2.09213
NY14TAP-22_75	4.94863	0.0165965	0.0786028	0.00962357	1186.46	17.9603	1162.15	18.9588	0.422919
NY14TAP-22_76	4.94632	0.0170069	0.0793938	0.0108922	1186.97	18.4109	1181.97	21.3791	3.79133
NY14TAP-22_77	4.18419	0.0157012	0.0904908	0.0080518	1381.47	19.4945	1435.91	15.2783	6.9599
NY14TAP-22_78	4.99802	0.0147913	0.0827658	0.00914515	1175.75	15.8775	1263.7	17.7605	1.10014
NY14TAP-22_79	3.85719	0.0153007	0.0921202	0.00978622	1486.04	20.275	1469.87	18.4645	5.98298
NY14TAP-22_80	5.17499	0.0166751	0.0805858	0.00925766	1138.89	17.3846	1211.36	18.1127	0.133829
NY14TAP-22_81	4.9683	0.014723	0.0793385	0.00875023	1182.17	15.8829	1180.59	17.2017	7.89875
NY14TAP-22_82	4.42014	0.0152628	0.0900931	0.00791569	1314.75	18.1272	1427.5	15.0385	2.99724
NY14TAP-22_83	4.5239	0.0155906	0.0821858	0.011897	1287.41	18.1687	1249.95	23.1096	1.70855
NY14TAP-22_84	5.69043	0.0159694	0.0734391	0.0136057	1043.62	15.3686	1026.09	27.2797	4.06798
NY14TAP-22_85	3.83854	0.0163198	0.0904069	0.008667	1492.48	21.7063	1434.14	16.4433	5.04387
NY14TAP-22_86	3.77725	0.0151974	0.0907501	0.00866211	1514.06	20.4748	1441.36	16.418	0.52412
NY14TAP-22_87	3.91751	0.0153904	0.0922866	0.00830377	1465.57	20.144	1473.29	15.6747	1.44703
NY14TAP-22_88	5.54212	0.0187208	0.0756212	0.0135466	1069.36	18.4206	1085.06	26.924	0.155702
NY14TAP-22_89	3.90191	0.0163236	0.0920549	0.011593	1470.81	21.4312	1468.52	21.853	2.33407
NY14TAP-22_90	3.81562	0.0156337	0.0919452	0.0113359	1500.48	20.8941	1466.25	21.3783	2.63295
NY14TAP-22_91	4.44456	0.0194934	0.0862408	0.019941	1308.21	23.0392	1343.59	38.0367	3.78757
NY14TAP-22_92	3.89662	0.0163019	0.0896859	0.0153424	1472.59	21.4259	1418.85	29.0474	4.34386
NY14TAP-22_93	5.2432	0.0174208	0.0791701	0.0129683	1125.29	17.9628	1176.39	25.441	3.11466
NY14TAP-22_94	5.63478	0.0170273	0.0732662	0.0123799	1053.13	16.5227	1021.32	24.8595	0.916991
NY14TAP-22_96	3.82799	0.0147398	0.0927387	0.00771176	1496.15	19.6508	1482.56	14.5445	8.12058
NY14TAP-22_97	5.83634	0.0147097	0.0765541	0.00725569	1019.49	13.8558	1109.6	14.4266	1.89324
NY14TAP-22_98	5.17299	0.0154476	0.0785682	0.00741156	1139.29	16.1116	1161.28	14.6236	2.04227
NY14TAP-22_100	4.5808	0.0155261	0.0820798	0.0101075	1272.9	17.9094	1247.42	19.663	9.99871
NY14TAP-22_101	5.29894	0.0186789	0.0816955	0.0205071	1114.42	19.0879	1238.23	39.6853	1.3283
NY14TAP-22_102	4.0568	0.0148134	0.0906623	0.00786803	1420.4	18.8565	1439.52	14.924	2.24894
NY14TAP-22_104	6.1606	0.0154826	0.0722139	0.0123238	969.667	13.9234	991.976	24.858	0.736522
NY14TAP-22_105	5.25449	0.0161118	0.0767562	0.0136821	1123.07	16.5848	1114.86	27.0713	1.62949
NY14TAP-22_106	5.68186	0.0158749	0.0747724	0.00910166	1045.08	15.2974	1062.39	18.2027	18.2007
NY14TAP-22_107	6.32653	0.022584	0.0783793	0.0165493	946.012	19.8404	1156.5	32.486	0.110795
NY14TAP-22_109	3.85887	0.0164868	0.0929616	0.0103181	1485.46	21.8365	1487.11	19.4166	10.1577
NY14TAP-22_110	4.32006	0.0176165	0.0933006	0.0176186	1342.24	21.311	1494	32.9752	0.0480146
NY14TAP-22_111	3.82155	0.0155693	0.0935537	0.0126669	1498.4	20.7827	1499.12	23.7639	2.30465
NY14TAP-22_112	5.97531	0.0160197	0.0732564	0.012714	997.523	14.788	1021.05	25.526	3.53929
NY14TAP-22_113	4.4246	0.0153468	0.0829758	0.00885322	1313.55	18.2118	1268.65	17.1846	2.64344
NY14TAP-22_114	4.1997	0.0149392	0.089471	0.00907787	1376.88	18.4946	1414.26	17.265	4.57897
NY14TAP-22_115	3.87777	0.0158311	0.0894695	0.0101642	1478.99	20.8883	1414.23	19.318	1.52455
NY14TAP-22_116	5.20774	0.0150737	0.078117	0.00865024	1132.32	15.6343	1149.85	17.0826	0.158712
NY14TAP-22_118	5.16566	0.0126642	0.0778319	0.00643822	1140.77	13.2273	1142.59	12.7458	1.4476
NY14TAP-22_121	5.603	0.0132465	0.0740759	0.00716252	1058.64	12.9195	1043.54	14.3831	1.2692
NY14TAP-22_122	4.95628	0.0139277	0.0789125	0.00636923	1184.79	15.0562	1169.94	12.5595	11.5812
NY14TAP-22_123	4.50949	0.0125233	0.0916553	0.00724338	1291.14	14.6364	1460.25	13.7061	0.999706
NY14TAP-22_124	4.39933	0.0134273	0.0858011	0.00730005	1320.37	16.0114	1333.71	14.0546	9.95187
NY14TAP-22_125	4.89122	0.0140666	0.0857122	0.00836696	1199.17	15.3739	1331.7	16.1024	12.5771
NY14TAP-22_126	2.31417	0.0142476	0.179511	0.00655354	2315.27	27.6538	2648.36	10.8323	1.65832
NY14TAP-22_127	5.04979	0.0134559	0.0779547	0.00647159	1164.72	14.3222	1145.72	12.8058	2.69662
NY14TAP-22_128	4.49244	0.013859	0.0857026	0.00715404	1295.58	16.2457	1331.48	13.779	0.747667
NY14TAP-22_129	5.33306	0.013795	0.0768083	0.00804238	1107.87	14.0267	1116.22	15.967	1.9994
NY14TAP-22_130	3.96566	0.0128536	0.0925748	0.008059	1449.63	16.665	1479.21	15.2029	3.89761
NY14TAP-22_131	6.0193	0.0128674	0.0708677	0.00655663	990.766	11.8064	953.599	13.353	1.30321
NY14TAP-22_132	5.61626	0.0130971	0.0750666	0.00691375	1056.34	12.7482	1070.28	13.8303	6.24795
NY14TAP-22_133	4.29243	0.013833	0.0906856	0.0107249	1350.04	16.8272	1440.01	20.3054	7.2344
NY14TAP-22_135	3.4207	0.012833	0.108962	0.00641857	1653.2	18.6864	1782.13	11.6574	3.28271
NY14TAP-22_136	4.49779	0.0139236	0.0859967	0.00716051	1294.18	16.3055	1338.11	13.7787	2.21317
NY14TAP-22_138	4.54932	0.0136245	0.0847523	0.00704693	1280.89	15.8077	1309.88	13.6147	7.96437
NY14TAP-22_139	6.17559	0.0155226	0.0743581	0.00928689	967.481	13.9301	1051.2	18.6021	0.118368
NY14TAP-22_140	5.19431	0.0127654	0.0775882	0.00890332	1135	13.2713	1136.35	17.6143	13.7994
NY14TAP-22_141	3.5824	0.0129915	0.112557	0.00604867	1587.04	18.2502	1841.1	10.9091	3.15715
NY14TAP-22_142	3.45388	0.0155974	0.0981364	0.0110164	1639.18	22.5358	1589.01	20.4454	1.84366
NY14TAP-22_143	1.95926	0.0136159	0.186129	0.00750604	2658.32	29.5926	2708.25	12.3303	2.23312
NY14TAP-22_144	3.99445	0.0128639	0.0922805	0.00669469	1440.27	16.5823	1473.16	12.6502	2.12226
NY14TAP-22_145	5.08765	0.0132255	0.0793896	0.00844807	1156.78	13.9897	1181.87	16.6079	1.39727
NY14TAP-22_146	3.98918	0.0126022	0.0917592	0.0063886	1441.97	16.2625	1462.41	12.0916	0.613558
NY14TAP-22_148	6.13865	0.0135074	0.0713323	0.0122126	972.885	12.1861	966.953	24.7297	1.63246
NY14TAP-22_150	5.19136	0.0139682	0.0768521	0.00943512	1135.59	14.5273	1117.35	18.7123	#DIV/0!
